# Supplementary material for: An efficient synthesis of 2,4,7-trisubstituted pyrimido[1,2-a][1,3,5]triazin-6-ones
Source: Royal Society of Chemistry journal article supplement (doi:10.1039/c5nj00405e), 2015-01-01
Supplement: c5nj00405e1.pdf [file c5nj00405e1.pdf]

New Journal of Chemistry

**An efficient synthesis of 2,4,7-trisubstituted  
pyrimido[1,2-a][1,3,5]triazin-6-ones**

Nikhil Sachdeva<sup>a, b</sup>, Anton V. Dolzhenko<sup>c, d</sup>, Seow Joo Lim<sup>a</sup>, Wee Ling Ong<sup>a</sup> and Wai Keung Chui<sup>a</sup>

<sup>a</sup> Department of Pharmacy, Faculty of Science, National University of Singapore, 18 Science Drive 4, Singapore 117543, Singapore

<sup>b</sup> School of Applied Science, Republic Polytechnic, Woodlands Avenue 9, Singapore 738964, Singapore

<sup>c</sup> School of Pharmacy, Monash University Malaysia, Jalan Lagoon Selatan, Bandar Sunway, Selangor Darul Ehsan 47500, Malaysia

<sup>d</sup> School of Pharmacy, Curtin Health Innovation Research Institute, Curtin University, GPO Box U1987 Perth, Western Australia 6845, Australia

(Supplementary Information)

## Experimental Section

Melting points (uncorrected) were determined on a Gallenkamp melting point apparatus. NMR spectra were recorded on a Bruker DPX-300 or a Bruker Avance DRX-400 at 298K using Me<sub>2</sub>SO-*d*<sub>6</sub> as a solvent and TMS as an internal reference. <sup>1</sup>H 2DNOESY spectra were acquired using a 150 ms mixing time. The raw data were processed using Topspin 2.1 (Bruker Scientific Inc.). IR spectra were performed on a Perkin Elmer Spectrum 100 FT-IR spectrophotometer in potassium bromide pellets. Mass spectra were obtained using either a Finnigan MAT LCQ MS mass spectrometer or a QTRAP 2000 LC-MS mass spectrometer using atmospheric pressure chemical ionization (APCI) mode. The course of the reactions was monitored by TLC on Silica gel 60 F<sub>254</sub> plates (Merck, Germany). HPLC analysis was performed on an Agilent Eclipse XDB-C18 (4.6x250 mm, 5 μm) column at 30°C, with a flow rate of 1 mL/min. 5-90% Gradients of MeOH/MeCN (solvent A) and H<sub>2</sub>O (solvent B) were used as mobile phases. Microwave-assisted reactions were conducted using a Biotage Initiator microwave synthesizer at maximal power of 400W. Elemental analyses were performed on a Perkin Elmer 2400 Elemental Analyzer Series II.

### *General methods for the synthesis of 2-amino-8-methyl-4-(het)aryl-3,4-dihydropyrimido[1,2-a][1,3,5]triazin-6-ones (5a-5l)*

Procedure 1: A mixture of guanidine **4** (0.5 g, 2.5 mmol) and an appropriate aldehyde (5.0 mmol) in acetic acid (3 mL) was heated under reflux for 5-9 h. The excess solvent was removed under reduced pressure and the solid obtained was neutralized using sodium carbonate solution (50%). The precipitate formed was filtered and purified by either recrystallization (EtOH) or column chromatography (dichloromethane/methanol - 8.5/1.5).

Procedure 2: A mixture of guanidine **4** (1.5 mmol) and an appropriate aldehyde (1.8 mmol) in 0.2-0.3 mL of acetic acid was irradiated in a 10 mL vial using a Biotage microwave synthesizer at 150°C for 25 min. After cooling, the precipitated crude product was filtered, washed with cold ethyl acetate followed by aqueous sodium carbonate, dried under vacuum and recrystallized.

### *2-Amino-8-methyl-4-phenyl-3,4-dihydropyrimido[1,2-a][1,3,5]triazin-6-one (5a)*

mp 264-265°C; MS (APCI) *m/z* 256.3 (MH<sup>+</sup>); <sup>1</sup>H NMR (300 MHz, Me<sub>2</sub>SO-*d*<sub>6</sub>): δ 2.05 (3H, s, 8-Me), 5.72 (1H, s, H-7), 6.86 (1H, s, H-4), 7.00 (2H, br s, NH<sub>2</sub>), 7.23 (2H, d, *J* = 7.9 Hz, H-2' and H-6'), 7.31-7.39 (3H, m, H-3', H-4' and H-5'), 8.28 (1H, s, NH); <sup>13</sup>C NMR (75 MHz, Me<sub>2</sub>SO-*d*<sub>6</sub>): δ 23.8 (8-Me), 59.8 (C-4), 102.2 (C-7), 125.2 (C-2' and C-6'), 128.4 (C-4'), 128.5 (C-3' and C-5'), 140.0 (C-1'), 154.1 (C-9a), 157.4 (C-2), 160.5 (C-6), 165.6 (C-8); IR (KBr): 3342 NH, 3057 CH, 1668 C=O, 1490, 1372. HPLC: purity 100%, *t<sub>R</sub>* 9.5 min (MeOH:H<sub>2</sub>O); purity 100%, *t<sub>R</sub>* 8.6 min (CH<sub>3</sub>CN:H<sub>2</sub>O).

### *2-Amino-8-methyl-4-(4-methylphenyl)-3,4-dihydropyrimido[1,2-a][1,3,5]triazin-6-one (5b)*

mp 267-268°C; MS (APCI) *m/z* 270.1 (MH<sup>+</sup>); Anal. Calcd. C, 62.44; H, 5.61; N, 26.01; found C, 61.98; H, 5.36; N, 26.02. <sup>1</sup>H NMR (300 MHz, Me<sub>2</sub>SO-*d*<sub>6</sub>): δ 2.04 (3H, s, 8-Me), 2.26 (3H, s, 4'-Me), 5.69 (1H, s, H-7), 6.82 (1H, d, *J* = 2.6 Hz, H-4), 7.00 (2H, br s, NH<sub>2</sub>), 7.11 (2H, d, *J* = 8.3 Hz, H-3' and H-5'), 7.16 (2H, d, *J* = 8.3 Hz, H-2' and H-6'), 8.23 (1H, d, *J* = 3.0 Hz, NH); <sup>13</sup>C NMR (75 MHz, Me<sub>2</sub>SO-*d*<sub>6</sub>): δ 20.5 (4'-Me), 23.8 (8-Me), 59.6 (C-4), 102.1 (C-7), 125.2 (C-2' and C-6'), 128.9 (C-3' and C-5'), 137.2 (C-1'), 137.7 (C-4'), 154.2 (C-9a), 157.4 (C-2), 160.5 (C-6), 165.6 (C-8); IR (KBr): ν 3331 NH, 3080 CH, 2922, 1688 C=O, 1663, 1592, 1487, 1366. HPLC: purity 98.5%, *t<sub>R</sub>* 11.4 min (MeOH:H<sub>2</sub>O); purity 100%, *t<sub>R</sub>* 7.7 min (CH<sub>3</sub>CN:H<sub>2</sub>O).

**2-Amino-4-(4-methoxyphenyl)-8-methyl-3,4-dihydropyrimido[1,2-a][1,3,5]triazin-6-one (5c)**

mp 252-253°C; MS (APCI)  $m/z$  289.1 (MH<sup>+</sup>); Anal. Calcd. C, 58.94; H, 5.30; N, 24.55; found C, 58.23; H, 5.09; N, 24.43. <sup>1</sup>H NMR (300 MHz, Me<sub>2</sub>SO-*d*<sub>6</sub>): δ 2.04 (3H, s, Me), 3.72 (3H, s, OMe), 5.69 (1H, s, H-7), 6.80 (1H, s, H-4), 6.91 (2H, d, *J* = 8.7 Hz, H-3' and H-5'), 7.00 (2H, br s, NH<sub>2</sub>), 7.16 (2H, d, *J* = 8.7 Hz, H-2' and H-6'), 8.20 (1H, s, NH); <sup>13</sup>C NMR (75 MHz, Me<sub>2</sub>SO-*d*<sub>6</sub>): δ 23.7 (8-Me), 55.1 (OMe), 59.6 (C-4), 102.2 (C-7), 113.8 (C-3' and C-5'), 126.6 (C-2' and C-6'), 132.2 (C-1'), 154.1 (C-9a), 157.4 (C-2), 159.2 (C-4'), 160.4 (C-6), 165.5 (C-8); IR (KBr); ν 3319 NH, 3083 CH, 2929 CH, 2837, 1687 C=O, 1661, 1612, 1585, 1487, 1395. HPLC: purity 100%, *t*<sub>R</sub> 12.6 min (MeOH:H<sub>2</sub>O); purity 100%, *t*<sub>R</sub> 7.1 min (CH<sub>3</sub>CN:H<sub>2</sub>O).

**2-Amino-4-(4-fluorophenyl)-8-methyl-3,4-dihydropyrimido[1,2-a][1,3,5]triazin-6-one (5d)**

mp 245-246°C; MS (APCI)  $m/z$  274.1 (MH<sup>+</sup>); <sup>1</sup>H NMR (300 MHz, Me<sub>2</sub>SO-*d*<sub>6</sub>): 2.05 (3H, s, 8-Me), 5.71 (1H, s, H-7), 6.86 (1H, s, H-4), 7.02 (2H, br s, NH<sub>2</sub>), 7.18-7.29 (4H, m, H-2', H-6', H-3', H-5'), 8.28 (1H, s, NH); <sup>13</sup>C NMR (75 MHz, Me<sub>2</sub>SO-*d*<sub>6</sub>): δ 23.8 (8-Me), 59.3 (C-4), 102.2 (C-7), 115.4 (d, <sup>2</sup>*J*<sub>C-F</sub> = 21.8 Hz (C-3' and C-5')), 127.5 (d, <sup>3</sup>*J* = 8.8 Hz, C-2' and C-6'), 136.4 (C-1'), 154.1 (C-9a), 157.4 (C-2), 160.5 (C-6), 161.9 (d, <sup>1</sup>*J*<sub>C-F</sub> = 244.6 Hz, C-4'), 165.9 (C-8); IR (KBr); ν 3357 NH, 3070 CH, 1683 C=O, 1654, 1604, 1575, 1528, 1467, 1414, 1236 CF. HPLC: purity 100%, *t*<sub>R</sub> 17.9 min (MeOH:H<sub>2</sub>O).

**2-Amino-8-methyl-4-(4-(trifluoromethyl)phenyl)-3,4-dihydropyrimido[1,2-a][1,3,5]triazin-6-one (5e)**

mp >300°C; MS (APCI)  $m/z$  324.1. <sup>1</sup>H NMR (300 MHz, Me<sub>2</sub>SO-*d*<sub>6</sub>): δ 2.03 (3H, s, 8-Me), 5.64 (1H, s, H-7), 6.83 (1H, s, H-4), 7.44 (2H, d, *J* = 8.3 Hz, H-2' and H-6'), 7.59 (2H, br s, NH<sub>2</sub>), 7.73 (2H, d, *J* = 7.9 Hz, H-3' and H-5'); <sup>13</sup>C NMR (75 MHz, Me<sub>2</sub>SO-*d*<sub>6</sub>): δ 23.9 (8-Me), 60.2 (C-4), 101.2 (C-7), 123.8 (q, <sup>1</sup>*J*<sub>C-F</sub> = 275.4 Hz, 4'-CF<sub>3</sub>), 125.4 (q, <sup>3</sup>*J*<sub>C-F</sub> = 3.3 Hz, C-3' and C-5'), 126.2 (C-2' and C-6'), 129.0 (q, <sup>2</sup>*J*<sub>C-F</sub> = 31.8 Hz, C-4'), 145.4 (C-1'), 154.5 (C-9a), 158.5 (C-2), 160.7 (C-6), 165.7 (C-8); IR (KBr); ν 3401 br NH, 1684 C=O, 1661, 1560, 1496, 1339. HPLC: purity 100%, *t*<sub>R</sub> 18.9 min (MeOH:H<sub>2</sub>O).

**2-Amino-4,8-dimethyl-3,4-dihydropyrimido[1,2-a][1,3,5]triazin-6-one (5f)**

mp >300°C (EtOH); MS (APCI)  $m/z$  194.3 (MH<sup>+</sup>); <sup>1</sup>H NMR (300 MHz, Me<sub>2</sub>SO-*d*<sub>6</sub>): δ 1.21 (3H, d, *J* = 6.0 Hz, CH<sub>3</sub>), 2.01 (3H, s, 8-Me), 5.64 (1H, s, H-7), 5.83 (1H, q, *J* = 5.8 Hz, H-4), 6.88 (2H, s, NH<sub>2</sub>), 7.65 (1H, s, NH); <sup>13</sup>C NMR (75 MHz, Me<sub>2</sub>SO-*d*<sub>6</sub>): δ 20.3 (4-Me), 23.7 (8-Me), 56.2 (C-4), 102.1 (C-7), 153.7 (C-9a), 156.8 (C-2), 160.2 (C-6), 165.2 (C-8). HPLC: purity 96.7%, *t*<sub>R</sub> 6.4 min (MeOH:H<sub>2</sub>O).

**2-Amino-4-isopropyl-8-methyl-3,4-dihydropyrimido[1,2-a][1,3,5]triazin-6-one (5g)**

mp 226-227°C (EtOH); MS (APCI)  $m/z$  222.3 (MH<sup>+</sup>); <sup>1</sup>H NMR (300 MHz, Me<sub>2</sub>SO-*d*<sub>6</sub>): δ 0.78 (3H, d, *J* = 9.0 Hz, Me), 0.79 (3H, d, *J* = 9.0 Hz, Me), 1.91 (1H, m, CHMe<sub>2</sub>), 2.01 (3H, s, 8-Me), 5.53 (1H, d, *J* = 5.0 Hz, H-4), 5.62 (1H, s, H-7), 7.10 (2H, br s, NH<sub>2</sub>); <sup>13</sup>C NMR (75 MHz, Me<sub>2</sub>SO-*d*<sub>6</sub>): δ 15.7 (Me), 17.5 (Me), 23.7 (8-Me), 33.0 (CH), 63.6 (C-4), 101.9 (C-7), 154.5 (C-9a), 157.8 (C-2), 160.7 (C-6), 165.1 (C-8); IR (KBr); ν 3334 br NH, 3111, 2966 (CH), 1670 C=O, 1489, 1400, 1290, 1222, 1136, 815, 790. HPLC: purity 99.1%, *t*<sub>R</sub> 10.3 min (MeOH:H<sub>2</sub>O).

**2-Amino-8-methyl-4-cyclohexyl-3,4-dihydropyrimido[1,2-a][1,3,5]triazin-6-one (5h)**

mp 221-222°C dec. (EtOH); MS (APCI)  $m/z$  262.3; <sup>1</sup>H NMR (300 MHz, Me<sub>2</sub>SO-*d*<sub>6</sub>): δ 0.81-1.20 (5H, m, H<sub>cyclohex</sub>), 1.36 (1H, s, H<sub>cyclohex</sub>), 1.60-1.78 (5H, m, H<sub>cyclohex</sub>), 2.02 (3H, s, 8-Me), 5.56 (1H, br s, H-4), 5.64 (1H, s, H-7), 6.84 (2H, s, NH<sub>2</sub>), 7.94 (1H, s, NH); <sup>13</sup>C NMR (75 MHz, Me<sub>2</sub>SO-*d*<sub>6</sub>): δ 23.7 (8-Me), 25.0, 25.1, 25.6, 26.1, 27.4, 42.5 (C-4'), 62.6 (C-4), 102.1 (C-7), 154.6 (C-9a), 157.5 (C-2), 160.6 (C-6), 165.1 (C-8); IR (KBr); ν 3292 br NH, 3132, 2927 (CH), 2848, 1645 C=O, 1483, 1400, 1288, 1220, 1132, 817. HPLC: purity 97.8%, *t*<sub>R</sub> 16.5 min (MeOH:H<sub>2</sub>O).

*2-Amino-8-methyl-4-phenylethyl-3,4-dihydropyrimido[1,2-a][1,3,5]triazin-6-one (5i)*

mp 243-244°C (EtOH); MS (APCI) *m/z* 284.1. <sup>1</sup>H NMR (300 MHz, Me<sub>2</sub>SO-*d*<sub>6</sub>): δ 1.68-1.95 (2H, m, CH<sub>2</sub>), 2.03 (3H, s, 8-Me), 2.53-2.75 (2H, m, CH<sub>2</sub>), 5.66 (1H, s, H-7), 5.80 (1H, br s, H-4), 6.97 (2H, br s, NH<sub>2</sub>), 7.12-7.32 (5H, m, H-2' H-6', H-3', H-5' and H-4'), 8.02 (1H, s, NH); <sup>13</sup>C NMR (75 MHz, Me<sub>2</sub>SO-*d*<sub>6</sub>): δ 23.8 (8-Me), 29.4 (CH<sub>2</sub>), 35.2 (CH<sub>2</sub>), 58.8 (C-4), 102.2 (C-7), 125.9 (C-4'), 128.0 (C-2' and C-6'), 128.3 (C-3' and C-5'), 140.5 (C-1'), 154.1 (C-9a), 157.4 (C-2), 160.3 (C-6), 165.3 (C-8); IR (KBr); ν 3356 br NH, 3084, 1678 C=O, 1647, 1489, 1404, 1294, 1134, 786. HPLC: purity 99.3%, *t<sub>R</sub>* 17.1 min (MeOH:H<sub>2</sub>O); purity 100%, *t<sub>R</sub>* 10.2 min (CH<sub>3</sub>CN:H<sub>2</sub>O).

*2-Amino-4-(furan-2-yl)-8-methyl-3,4-dihydropyrimido[1,2-a][1,3,5]triazin-6-one (5j)*

mp >300°C; MS (APCI) *m/z* 246.2 (MH<sup>+</sup>); <sup>1</sup>H NMR (300 MHz, Me<sub>2</sub>SO-*d*<sub>6</sub>): δ 2.02 (3H, s, Me), 5.64 (1H, s, H-7), 6.19 (1H, d, *J* = 3.0 Hz, H-3'), 6.38 (1H, dd, *J* = 3.5, 1.6 Hz, H-4'), 6.87 (1H, s, H-4), 7.10 (2H, br s, NH<sub>2</sub>), 7.58 (1H, d, *J* = 1.0 Hz, H-5'), 8.25 (1H, s, NH); <sup>13</sup>C NMR (75 MHz, Me<sub>2</sub>SO-*d*<sub>6</sub>): δ 23.8 (8-Me), 55.4 (C-4), 101.8 (C-7), 106.9 (C-3'), 110.3 (C-4'), 142.8 (C-5'), 152.0 (C-2'), 153.9 (C-9a), 157.7 (C-2), 160.0 (C-6), 165.5 (C-8); IR (KBr); ν 3344 NH, 3066 CH, 2804, 2697, 1669 br C=O, 1490. HPLC: purity 97.5%, *t<sub>R</sub>* 15.9 min (MeOH:H<sub>2</sub>O); purity 100%, *t<sub>R</sub>* 7.9 min (CH<sub>3</sub>CN:H<sub>2</sub>O).

*2-Amino-8-methyl-4-(thiophen-2-yl)-3,4-dihydropyrimido[1,2-a][1,3,5]triazin-6-one (5k)*

mp 275-276°C; LC-MS (APCI) MS *m/z*: 262.6 (MH<sup>+</sup>); <sup>1</sup>H NMR (300 MHz, Me<sub>2</sub>SO-*d*<sub>6</sub>): δ 2.03 (3H, s, 8-Me), 5.71 (1H, s, H-7), 6.94-6.98 (2H, m, H-4 and H-4'), 7.06 (1H, s, H-3'), 7.13 (2H, br s, NH<sub>2</sub>), 7.45 (1H, d, *J* = 4.5 Hz, H-5'), 8.30 (1H, br s, NH); <sup>13</sup>C NMR (75 MHz, Me<sub>2</sub>SO-*d*<sub>6</sub>): δ 23.8 (8-Me), 56.9 (C-4), 102.2 (C-7), 125.2 (C-3'), 126.3 (C-5'), 126.4 (C-4'), 143.0 (C-2'), 153.4 (C-9a), 157.5 (C-2), 160.1 (C-6), 165.7 (C-8) IR (KBr); ν 3466 NH, 3020 CH, 1679 C=O, 1651, 1628, 1610, 1570, 1533, 1518, 1468, 1414. HPLC: purity 98.9%, *t<sub>R</sub>* 11.5 min (MeOH:H<sub>2</sub>O).

*2-Amino-8-methyl-4-(pyridin-2-yl)-3,4-dihydropyrimido[1,2-a][1,3,5]triazin-6-one (5l)*

mp >300°C (EtOH); MS (APCI) *m/z* 257.1. <sup>1</sup>H NMR (300 MHz, Me<sub>2</sub>SO-*d*<sub>6</sub>): δ 2.04 (3H, s, 8-Me), 5.63 (1H, s, H-7), 6.75 (1H, s, H-4), 7.21 (2H, br s, NH<sub>2</sub>), 7.27-7.39 (2H, m, H-5' and H-3'), 7.79 (1H, t, *J* = 7.5 Hz, H-4'), 8.48 (1H, d, *J* = 4.1 Hz, H-6'); <sup>13</sup>C NMR (75 MHz, Me<sub>2</sub>SO-*d*<sub>6</sub>): δ 23.8 (8-Me), 61.6 (C-4), 101.8 (C-7), 120.5 (C-3' and C-5'), 123.5 (C-4'), 137.0 (C-2'), 149.0 (C-6'), 154.4 (C-9a), 157.8 (C-2), 160.7 (C-6), 165.5 (C-8); IR (KBr); ν 3401 br NH, 1684 C=O, 1661, 1560, 1496, 1339. HPLC: purity 98.5%, *t<sub>R</sub>* 10.7 min (MeOH:H<sub>2</sub>O).

*General methods for the synthesis of 2-amino-4-(het)aryl-8-trifluoromethyl-3,4-dihydro-pyrimido[1,2-a][1,3,5]triazin-6-one (5m-5v)*

Procedure 1: A mixture of **4** (0.5 g, 2.5 mmol) and an appropriate aldehyde (3.0 mmol) in DMF (5 mL) was heated under reflux for 3-8 h. After 2 hours, more amount (up to 0.5 equivalent) of the aldehyde was added to facilitate the completion of reaction. The reaction mixture was concentrated under vacuum, filtered, washed with diethyl ether and recrystallized from DMF.

Procedure 2: A mixture of guanidine **4** (1.5 mmol) and an appropriate aldehyde (2.0 mmol) in DMF (1.0 mL) was irradiated in a 10mL vial using a Biotage initiator microwave synthesizer at 165 °C for 20 min. After cooling, the precipitated product was filtered, washed with diethyl ether and recrystallized.

**2-Amino-4-phenyl-8-trifluoromethyl-3,4-dihydropyrimido[1,2-a][1,3,5]triazin-6-one (5m)**

mp 255-256°C (DMF); TLC (silica gel, 8.5:1.5 DCM:MeOH):  $R_f$  0.90; MS (ESI)  $m/z$ : 310.047 [MH]<sup>+</sup>; Anal. Calcd. for C<sub>13</sub>H<sub>10</sub>F<sub>3</sub>N<sub>5</sub>O: C, 50.49; H, 3.26; N, 22.65; found C, 50.16; H 4.43; N 22.04. <sup>1</sup>H NMR (300 MHz, Me<sub>2</sub>SO-*d*<sub>6</sub>): δ 6.24 (1H, s, H-7), 6.92 (1H, s, H-4), 7.26 (2H, d,  $J$  = 7.5 Hz, H-2' and H-6'), 7.29 (2H, br s, NH<sub>2</sub>), 7.35-7.43 (3H, m, H-3', H-4' and H-5'), 8.53 (1H, br s, NH); <sup>13</sup>C NMR (75 MHz, Me<sub>2</sub>SO-*d*<sub>6</sub>): 60.4 (C-4), 100.9 (q, <sup>3</sup> $J_{C-F}$  = 3.5 Hz, C-7), 122.6 (q, <sup>1</sup> $J_{C-F}$  = 274.6 Hz, CF<sub>3</sub>), 125.2 (C-2' and C-6'), 128.7 (C-3', C-4' and C-5'), 139.3 (C-1'), 153.4 (q, <sup>2</sup> $J_{C-F}$  = 33.5 Hz, C-8), 155.9 (C-9a), 157.6 (C-2), 160.4 (C-6); IR (KBr); ν 3333 NH, 3144, 2951 CH, 2802, 1663 C=O, 1492, 1278. HPLC: purity 100%,  $t_R$  4.84 min (MeOH:H<sub>2</sub>O).

**2-Amino-4-(4-methylphenyl)-8-(trifluoromethyl)-3,4-dihydropyrimido[1,2-a][1,3,5]triazin-6-one (5n)**

mp 251-252°C (DMF); TLC (silica gel, 8.5:1.5 DCM:MeOH):  $R_f$  0.5; MS  $m/z$ : 324.060 [MH]<sup>+</sup>; Anal. Calcd. for C<sub>14</sub>H<sub>12</sub>F<sub>3</sub>N<sub>5</sub>O: C, 52.01; H, 3.74; N, 21.66; found: C, 51.87; H, 3.50; N, 21.63. <sup>1</sup>H NMR (300 MHz, Me<sub>2</sub>SO-*d*<sub>6</sub>): δ 2.27 (3H, s, Me), 6.22 (1H, s, H-7), 6.88 (1H, d,  $J$  = 2.3 Hz, H-4), 7.14 (2H, d,  $J$  = 7.9 Hz, H-3' and H-5'), 7.19 (2H, d,  $J$  = 7.9 Hz, H-2' and H-6'), 7.40 (2H, br s, NH<sub>2</sub>), 8.49 (1H, d,  $J$  = 2.3 Hz, NH); <sup>13</sup>C NMR (75 MHz, Me<sub>2</sub>SO-*d*<sub>6</sub>): 20.6 (4'-Me), 60.2 (C-4), 100.8 (q, <sup>3</sup> $J_{C-F}$  = 3.1 Hz, C-7), 120.8 (q, <sup>1</sup> $J_{C-F}$  = 275.0 Hz, CF<sub>3</sub>), 125.2 (C-2' and C-6'), 129.2 (C-3' and C-5'), 136.4 (C-4'), 138.3 (C-1'), 153.3 (q, <sup>2</sup> $J_{C-F}$  = 33.5 Hz, C-8), 155.9, 157.6, 160.3; IR (KBr); ν 3419 NH, 3345, 3154, 2954 CH, 2821, 1684, 1658 C=O, 1552, 1491, 1424, 1298, 1276. HPLC: purity 100%,  $t_R$  4.90 min (MeOH:H<sub>2</sub>O).

**2-Amino-4-(4-methoxyphenyl)-8-(trifluoromethyl)-3,4-dihydropyrimido[1,2-a][1,3,5]triazin-6-one (5o)**

mp 225-226°C (DMF); TLC (silica gel, 8.5:1.5 DCM:MeOH):  $R_f$  0.40; Anal. Calcd. for C<sub>14</sub>H<sub>12</sub>F<sub>3</sub>N<sub>5</sub>O<sub>2</sub>: C, 49.56; H, 3.57; N, 20.64; found: C, 49.31; H, 4.09; N, 19.83. <sup>1</sup>H NMR (300 MHz, Me<sub>2</sub>SO-*d*<sub>6</sub>): δ 3.73 (3H, s, OMe), 6.22 (1H, s, H-7), 6.86 (1H, s, H-4), 6.95 (2H, d,  $J$  = 8.7 Hz, H-3' and H-5'), 7.20 (2H, d,  $J$  = 8.7 Hz, H-2' and H-6'), 7.36 (2H, br s, NH<sub>2</sub>), 8.49 (1H, s, NH); <sup>13</sup>C NMR (75 MHz, Me<sub>2</sub>SO-*d*<sub>6</sub>): 55.1 (OMe), 60.1 (C-4), 100.9 (q, <sup>3</sup> $J_{C-F}$  = 3.5 Hz, C-7), 114.0 (C-3' and C-5'), 120.8 (q, <sup>1</sup> $J_{C-F}$  = 275.6 Hz, CF<sub>3</sub>), 126.6 (C-2' and C-6'), 131.4 (C-1'), 153.3 (q, <sup>2</sup> $J_{C-F}$  = 33.0 Hz, C-8), 155.7, 157.5, 159.5 (C-4'), 160.3. HPLC: purity 96.5%,  $t_R$  4.95 min (MeOH:H<sub>2</sub>O).

**2-Amino-4-(4-fluorophenyl)-8-(trifluoromethyl)-3,4-dihydropyrimido[1,2-a][1,3,5]triazin-6-one (5p)**

mp 260-261°C (MeOH); TLC (silica gel, 8.5:1.5 DCM:MeOH):  $R_f$  0.7; MS (ESI)  $m/z$ : 328.034 [MH]<sup>+</sup>; Anal. Calcd. for C<sub>13</sub>H<sub>9</sub>F<sub>4</sub>N<sub>5</sub>O: C, 47.71; H, 2.77; N, 21.40; found: C, 47.38; H, 2.81; N, 21.24. <sup>1</sup>H NMR (300 MHz, Me<sub>2</sub>SO-*d*<sub>6</sub>): δ 6.23 (1H, s, H-7), 6.91 (1H, d,  $J$  = 3.8 Hz, H-4), 7.21-7.34 (4H, m, H2', H6', H3' and H5'), 7.46 (2H, br s, NH<sub>2</sub>), 8.50 (1H, d,  $J$  = 3.8 Hz, NH). <sup>13</sup>C NMR (75 MHz, Me<sub>2</sub>SO-*d*<sub>6</sub>): 59.9 (C-4), 100.9 (q, <sup>3</sup> $J_{C-F}$  = 2.7 Hz, C-7), 115.7 (d, <sup>2</sup> $J_{C-F}$  = 21.8 Hz, C-3' and C-5'), 120.8 (q, <sup>1</sup> $J_{C-F}$  = 275.6 Hz, CF<sub>3</sub>), 127.5 (d, <sup>3</sup> $J_{C-F}$  = 8.8 Hz, C-2' and C-6'), 135.6 (d, <sup>4</sup> $J_{C-F}$  = 2.8 Hz, C-1'), 153.4 (q, <sup>2</sup> $J_{C-F}$  = 33.3 Hz, C-8), 155.8, 157.5, 160.3, 162.1 (d, <sup>1</sup> $J_{C-F}$  = 245.2 Hz, C-4').

**2-Amino-8-(trifluoromethyl)-4-[4-(trifluoromethyl)phenyl]-3,4-dihydropyrimido[1,2-a][1,3,5]triazin-6-one (5q)**

mp 150-151°C (DMF); TLC (silica gel, 8.5:1.5 DCM:MeOH):  $R_f$  0.7; MS  $m/z$ : 378.021 [MH]<sup>+</sup>; Anal. Calcd. for C<sub>14</sub>H<sub>9</sub>F<sub>6</sub>N<sub>5</sub>O: C, 44.57; H, 2.40; N, 18.56; found: C, 44.30; H, 2.37; N, 18.48. <sup>1</sup>H NMR (300 MHz, Me<sub>2</sub>SO-*d*<sub>6</sub>): δ 6.27 (1H, s, H-7), 7.00 (1H, d,  $J$  = 2.2 Hz, H-4), 7.48 (2H, d,  $J$  = 8.3 Hz, H-2' and H-6'), 7.38 (2H, br s, NH<sub>2</sub>), 7.81 (2H, d,  $J$  = 8.3 Hz, H-3' and H-5'), 8.62 (1H,  $J$  = 2.2 Hz, NH); <sup>13</sup>C NMR (75 MHz, Me<sub>2</sub>SO-*d*<sub>6</sub>): 60.2 (C-4), 100.9 (q, <sup>3</sup> $J_{C-F}$  = 3.4 Hz, C-7), 120.8 (q, <sup>1</sup> $J_{C-F}$  = 275.4 Hz, 8-CF<sub>3</sub>), 123.9 (q, <sup>1</sup> $J_{C-F}$  = 275.4 Hz, 4'-CF<sub>3</sub>), 125.9 (q, <sup>3</sup> $J_{C-F}$  = 3.5 Hz, C-3' and C-5'), 126.2 (C-2' and 6'), 129.3 (q, <sup>2</sup> $J_{C-F}$  = 31.8 Hz, C-4'), 143.7 (d, <sup>4</sup> $J_{C-F}$  = 1.2 Hz, C-1'), 153.5 (q, <sup>2</sup> $J_{C-F}$  = 33.7 Hz, C-8), 155.8, 157.5,

160.4; IR (KBr);  $\nu$  3336 br NH, 3166 br, 2949, 1684, 1550, 1496, 1419, 1329, 1278, 1219. HPLC: purity 99.4%,  $t_R$  6.03 min (MeOH:H<sub>2</sub>O).

**2-Amino-4-(furan-2-yl)-8-(trifluoromethyl)-3,4-dihydropyrimido[1,2-a][1,3,5]triazin-6-one (5r)**

mp 226-227°C (DMF); TLC (silica gel, 8.5:1.5 DCM:MeOH):  $R_f$  0.5; MS  $m/z$ : 300.025 [MH]<sup>+</sup>; Anal. Calcd. for C<sub>11</sub>H<sub>8</sub>F<sub>3</sub>N<sub>5</sub>O<sub>2</sub>: C, 44.16; H, 2.69; N, 23.41; found: C, 43.21; H, 3.04; N, 22.81. <sup>1</sup>H NMR (300 MHz, Me<sub>2</sub>SO-*d*<sub>6</sub>):  $\delta$  6.21 (1H, s, H-7), 6.33 (1H, d,  $J = 3.0$  Hz, H-3'), 6.44 (1H, dd,  $J = 3.0$  Hz,  $J = 1.9$  Hz, H-4'), 6.95 (1H, s, H-4), 7.19 (2H, br s, NH<sub>2</sub>), 7.65 (1H, d,  $J = 0.8$  Hz, H-5'), 8.45 (1H, s, NH). <sup>13</sup>C NMR (75 MHz, Me<sub>2</sub>SO-*d*<sub>6</sub>): 55.3 (C-4), 100.8 (q, <sup>3</sup> $J_{C-F} = 3.2$  Hz, C-7), 107.8 (C-3'), 110.5 (C-4'), 120.8 (q, <sup>1</sup> $J_{C-F} = 275.2$  Hz, CF<sub>3</sub>), 143.5 (C-5'), 150.7 (C-2'), 153.4 (q, <sup>2</sup> $J_{C-F} = 33.5$  Hz, C-8), 155.6, 157.8, 159.9; IR (KBr);  $\nu$  3294 NH, 3153, 2941, 2817, 1697, 1664 C=O, 1496, 1410, 1299, 1277, 1229. HPLC: purity 100%,  $t_R$  4.03 min (MeOH:H<sub>2</sub>O).

**2-Amino-4-(thiophen-2-yl)-8-(trifluoromethyl)-3,4-dihydropyrimido[1,2-a][1,3,5]triazin-6-one (5s)**

mp 174-175°C (DMF); TLC (silica gel, 8.5:1.5 DCM:MeOH):  $R_f$  0.5; MS  $m/z$ : 316.002 [MH]<sup>+</sup>; Anal. Calcd. for C<sub>11</sub>H<sub>8</sub>F<sub>3</sub>N<sub>5</sub>OS: C, 41.91; H, 2.56; N, 22.21; found: C, 41.61; H, 3.17; N, 22.00. <sup>1</sup>H NMR (300 MHz, Me<sub>2</sub>SO-*d*<sub>6</sub>):  $\delta$  6.30 (1H, s, H-7), 6.99-7.02 (1H, m, H-4'), 7.06 (1H, d,  $J = 3.0$  Hz, H-3'), 7.15 (1H, s, H-4), 7.51 (1H, dd,  $J = 4.9$  Hz, 1.1 Hz, H-5'), 7.58 (2H, br s, NH<sub>2</sub>), 8.73 (1H, br s, NH); <sup>13</sup>C NMR (75 MHz, Me<sub>2</sub>SO-*d*<sub>6</sub>): 57.4 (C-4), 101.4 (q, <sup>3</sup> $J_{C-F} = 3.2$  Hz, C-7), 120.7 (q, <sup>1</sup> $J_{C-F} = 275.2$  Hz, CF<sub>3</sub>), 125.7 (C-3'), 126.6 (C-5'), 126.8 (C-4'), 141.7 (C-2'), 153.2 (q, <sup>2</sup> $J_{C-F} = 33.5$  Hz, C-8), 154.5, 157.2, 159.8; IR (KBr);  $\nu$  3290 NH, 3106, 1669 C=O, 1489, 1277. HPLC: purity 100%,  $t_R$  4.54 min (MeOH:H<sub>2</sub>O).

**2-Amino-4-(pyridin-2-yl)-8-(trifluoromethyl)-3,4-dihydropyrimido[1,2-a][1,3,5] triazin-6-one (5t)**

mp 253-254°C (DMF); TLC (silica gel, 8.5:1.5 DCM:MeOH):  $R_f$  0.6; MS (ESI)  $m/z$ : 311.043 [MH]<sup>+</sup>; Anal. Calcd. for C<sub>12</sub>H<sub>9</sub>F<sub>3</sub>N<sub>6</sub>O: C, 46.46; H, 2.92; N, 27.09; found: C, 46.18; H, 3.11; N, 26.98. <sup>1</sup>H NMR (300 MHz, Me<sub>2</sub>SO-*d*<sub>6</sub>):  $\delta$  6.18 (1H, s, H-7), 6.87 (1H, s, H-4), 7.18 (2H, br s, NH<sub>2</sub>), 7.35-7.42 (2H, m, H-3' and H-5'), 7.86 (1H, dt, H-4', <sup>3</sup> $J = 7.9$  Hz, <sup>4</sup> $J = 1.5$  Hz), 8.48-8.52 (2H, m, NH and H-6'); <sup>13</sup>C NMR (75 MHz, Me<sub>2</sub>SO-*d*<sub>6</sub>): 61.6 (C-4), 100.6 (q, <sup>3</sup> $J_{C-F} = 3.3$  Hz, C-7), 120.7 (C-5'), 120.9 (q, <sup>1</sup> $J_{C-F} = 275.2$  Hz, CF<sub>3</sub>), 124.0 (C-3'), 137.3 (C-4'), 149.2 (C-6'), 153.4 (q, <sup>2</sup> $J_{C-F} = 33.5$  Hz, C-8), 156.3, 156.7 (C-2'), 157.5, 160.5; IR (KBr);  $\nu$  3391 NH, 3139, 2944, 2802, 1696, 1656 C=O, 1486, 1278. HPLC: purity 98.7%,  $t_R$  4.02 min (MeOH:H<sub>2</sub>O).

**2-Amino-4-(4-chlorophenyl)-8-(trifluoromethyl)-3,4-dihydropyrimido[1,2-a][1,3,5]triazin-6-one (5u)**

mp 256-257°C (DMF); TLC (silica gel, 8.5:1.5 DCM:MeOH):  $R_f$  0.6; MS (ESI)  $m/z$ : 344.000, 346.000 [MH]<sup>+</sup>; Anal. Calcd. for C<sub>13</sub>H<sub>9</sub>ClF<sub>3</sub>N<sub>5</sub>O: C, 45.43; H, 2.64; N, 20.38; found: C, 45.46; H, 2.52; N, 20.39. <sup>1</sup>H NMR (300 MHz, Me<sub>2</sub>SO-*d*<sub>6</sub>):  $\delta$  6.25 (1H, s, H-7), 6.92 (1H, s, H-4), 7.28 (2H, d,  $J = 8.3$  Hz, H-2' and H-6'), 7.38 (2H, br s, NH<sub>2</sub>), 7.49 (2H, d,  $J = 8.3$  Hz, H-3' and H-5'), 8.54 (1H, br s, NH). <sup>13</sup>C NMR (75 MHz, Me<sub>2</sub>SO-*d*<sub>6</sub>): 60.0 (C-4), 101.0 (q, <sup>3</sup> $J_{C-F} = 3.5$  Hz, C-7), 120.8 (q, <sup>1</sup> $J_{C-F} = 275.6$  Hz, CF<sub>3</sub>), 127.2 (C-3' and C-5'), 128.8 (C-2' and C-6'), 133.5 (C-4'), 138.2 (C-1'), 153.4 (q, <sup>2</sup> $J_{C-F} = 33.5$  Hz, C-8), 155.7, 157.4, 160.3; Calcd. for C<sub>13</sub>H<sub>9</sub>ClF<sub>3</sub>N<sub>5</sub>O: 343.045, 345.042; IR (KBr);  $\nu$  3333 NH, 3152, 2951, 2822, 1685, 1657 C=O, 1551, 1491, 1415, 1276, 1225, 1096 (C-Cl). HPLC: purity 100%,  $t_R$  6.40 min (MeOH:H<sub>2</sub>O).

**2-Amino-4-(4-bromophenyl)-8-(trifluoromethyl)-3,4-dihydropyrimido[1,2-a][1,3,5]triazin-6-one (5v)**

mp 242-243°C (DMF); TLC (silica gel, 8.5:1.5 DCM:MeOH):  $R_f$  0.6; MS  $m/z$ : 387.943, 389.941 [MH]<sup>+</sup>; Anal. Calcd. for C<sub>13</sub>H<sub>9</sub>BrF<sub>3</sub>N<sub>5</sub>O: C, 40.23; H, 2.34; N, 18.04; found: C, 40.01; H, 2.19; N, 18.03. <sup>1</sup>H NMR (300 MHz, Me<sub>2</sub>SO-*d*<sub>6</sub>):  $\delta$  6.24 (1H, s, H-7), 6.90 (1H, s, H-4), 7.22 (2H, d,  $J = 8.7$  Hz, H-2' and

H-6'), 7.38 (2H, br s, NH<sub>2</sub>), 7.62 (2H, d,  $J = 8.3$  Hz, H-3' and H-5'), 8.52 (1H, br s, NH). <sup>13</sup>C NMR (75 MHz, Me<sub>2</sub>SO-*d*<sub>6</sub>): 60.0 (C-4), 100.9 (q, <sup>3</sup> $J_{C-F} = 3.5$  Hz, C-7), 120.8 (q, <sup>1</sup> $J_{C-F} = 274.6$  Hz, CF<sub>3</sub>), 122.1 (C-4'), 127.5 (C-3' and C-5), 131.7 (C-2' and C-6'), 138.6 (C-1'), 153.4 (q, <sup>2</sup> $J_{C-F} = 33.5$  Hz, C-8), 155.8, 157.5, 160.3; IR (KBr)  $\nu$  3485 and 3464 NH<sub>2</sub>, 3331 NH, 2980 CH, 2823, 1711 C=O, 1674, 1662, 1613, 1558, 1489, 1456, 1411, 1295, 1273, 1235, 1217, 1205, 618(C-Br). HPLC: purity 100%,  $t_R$  6.58 min (MeOH:H<sub>2</sub>O).

*General methods for the synthesis of 4-substituted 2-amino-8-phenyl-3,4-dihydropyrimido[1,2-a][1,3,5]triazin-6-one (5w-5af)*

Procedure 1: A mixture of **4** (0.5 g, 2.5 mmol) and an appropriate aldehyde (3.0 mmol) in DMF (5 mL) was heated under reflux for 3-8 h. After 2 hours, more amount (up to 0.5 equivalent) of the aldehyde was added to facilitate the completion of reaction. The reaction mixture was concentrated under vacuum, filtered, washed with diethyl ether and recrystallized from suitable solvent.

Procedure 2: A mixture of guanidine **4** (1.5 mmol) and an appropriate aldehyde (2.0 mmol) in DMF (1.0 mL) was irradiated in a 10mL vial using a Biotage initiator microwave synthesizer at 170°C for 20 min. After cooling, the precipitated product was filtered, washed with diethyl ether and recrystallized.

*2-Amino-4,8-diphenyl-3,4-dihydropyrimido[1,2-a][1,3,5]triazin-6-one (5w)*

mp 260-261°C (MeOH-AcOEt); TLC (silica gel, MeOH:CH<sub>2</sub>Cl<sub>2</sub>, 1:6):  $R_f$  0.43; MS (ESI)  $m/z = 318.1$  (MH<sup>+</sup>). <sup>1</sup>H NMR (300 MHz, Me<sub>2</sub>SO-*d*<sub>6</sub>):  $\delta$  6.44 (1H, s, H-7), 6.93 (1H, s, H-4), 7.11 (2H, br s, NH<sub>2</sub>), 7.24-7.55 (8H, m, H<sub>Ar</sub>), 8.00 (2H, dd,  $J = 7.0$  Hz, 3.2 Hz, H-2'' and H-6''), 8.36 (1H, br s, NH); <sup>13</sup>C NMR (75 MHz, Me<sub>2</sub>SO-*d*<sub>6</sub>):  $\delta$  60.0 (C-4), 99.1 (C-7), 125.3, 126.6 (C-7), 128.3 (C-2' and C-6'), 128.5, 128.6, 130.0, 137.1 (C-4'), 140.0 (C-1'), 151.2, 154.5 (br, C-2), 157.5 (C-9a), 161.2 (C-6), 161.8 (C-8). HPLC: purity 100%,  $t_R$  11.0 min (MeOH:H<sub>2</sub>O).

*2-Amino-4-(4-methylphenyl)-8-phenyl-3,4-dihydropyrimido[1,2-a][1,3,5]triazin-6-one (5x)*

mp 241-242°C (MeOH-AcOEt); <sup>1</sup>H NMR (300 MHz, Me<sub>2</sub>SO-*d*<sub>6</sub>):  $\delta$  2.26 (3H, s, Me), 6.42 (1H, s, H-7), 6.90 (1H, s, H-4), 7.08-7.15 (6H, m, NH<sub>2</sub>, H-2', H-6', H-3' and H-5'), 7.51-7.62 (3H, m, H-3'', H-4'' and H-5''), 8.01 (2H, dd,  $J = 7.0$  Hz, 3.2 Hz, H-2'' and H-6''), 8.29 (1H, d,  $J = 3.4$  Hz, NH). HPLC: purity 99.2%,  $t_R$  12.3 min (MeOH:H<sub>2</sub>O).

*2-Amino-4-(4-methoxyphenyl)-8-phenyl-3,4-dihydropyrimido[1,2-a][1,3,5]triazin-6-one (5y)*

mp 249-250°C (MeOH-AcOEt); TLC (silica gel, MeOH:CH<sub>2</sub>Cl<sub>2</sub>, 1:6):  $R_f$  0.43; MS (ESI)  $m/z = 348.1$  (MH<sup>+</sup>); Anal. Calcd. C, 65.69; H, 4.93; N, 20.16; found C, 65.20; H, 4.83; N, 20.09. <sup>1</sup>H NMR (300 MHz, Me<sub>2</sub>SO-*d*<sub>6</sub>):  $\delta$  3.72 (3H, s, OMe), 6.41 (1H, s, H-7), 6.87 (1H, d,  $J = 3.4$  Hz, H-4), 6.93 (2H, d, = 8.7 Hz, H-2' and H-6'), 7.07 (2H, br s, NH<sub>2</sub>), 7.23 (2H, d, = 8.7 Hz, H-3' and H-5'), 7.51-7.62 (3H, m, H-3'', H-4'' and H-5''), 8.00 (2H, dd,  $J = 7.0$  Hz, 3.2 Hz, H-2'' and H-6''), 8.27 (1H, d,  $J = 3.4$  Hz, NH); <sup>13</sup>C NMR (75 MHz, Me<sub>2</sub>SO-*d*<sub>6</sub>):  $\delta$  55.1 (OMe), 59.8 (C-4), 99.1 (C-7), 113.9, 126.6, 126.7, 128.3 (C-2' and C-6'), 129.3, 129.9, 132.2, 137.1 (C-4'), 154.5 (br, C-2), 157.5 (C-9a), 159.3 (C-1'), 161.1 (C-6), 161.7 (C-8). HPLC: purity 100%,  $t_R$  16.5 min (MeOH:H<sub>2</sub>O).

*2-Amino-4-(4-fluorophenyl)-8-phenyl-3,4-dihydropyrimido[1,2-a][1,3,5]triazin-6-one (5z)*

mp 268-269°C (MeOH-AcOEt); TLC (silica gel, MeOH:CH<sub>2</sub>Cl<sub>2</sub>, 1:6):  $R_f$  0.31; MS (ESI)  $m/z = 336.1$  (MH<sup>+</sup>). <sup>1</sup>H NMR (300 MHz, Me<sub>2</sub>SO-*d*<sub>6</sub>):  $\delta$  6.44 (1H, s, H-7), 6.94 (1H, s, H-4), 7.01 (2H, br s, NH<sub>2</sub>), 7.10-7.59 (7H, m, H-3'', H-4'', H-5'', H-2', H-6', H-3', H-5'), 7.90-8.11 (2H, m, H-2'' and H-6''), 8.36

(1H, br s, NH); <sup>13</sup>C NMR (75 MHz, Me<sub>2</sub>SO-*d*<sub>6</sub>): δ 59.6 (C-4), 99.1 (C-7), 115.5 (d, <sup>2</sup>*J* = 21.2 Hz, C-3' and C-5'), 126.6, 127.5 (d, <sup>3</sup>*J* = 7.5 Hz, C-2' and C-6'), 128.3, 130.01, 136.3, 137.0, 154.3 (C-2), 157.4 (C-9a), 161.0 (C-6), 161.8 (C-8), 162.0 (d, <sup>1</sup>*J* = 240.3 Hz, C-4'). HPLC: purity 99.6%, *t*<sub>R</sub> 17.7 min (MeOH:H<sub>2</sub>O).

**2-Amino-8-phenyl-4-(4-(trifluoromethyl)phenyl)-3,4-dihydropyrimido[1,2-*a*][1,3,5]triazin-6-one (5aa)**

mp 239-240 °C (MeOH-AcOEt); TLC (silica gel, MeOH:CH<sub>2</sub>Cl<sub>2</sub>, 1:6): *R*<sub>f</sub> 0.55. MS (ESI) *m/z* = 304.0 (MH<sup>+</sup>). <sup>1</sup>H NMR (300 MHz, Me<sub>2</sub>SO-*d*<sub>6</sub>): δ 6.49 (1H, s, H-7), 7.05 (1H, s, H-4), 7.24 (2H, br s, NH<sub>2</sub>), 7.38-7.49 (3H, m, H-3'', H-4'' and H-5''), 7.53 (2H, d, <sup>3</sup>*J* = 7.9 Hz, H-2' and H-6'), 7.80 (2H, d, <sup>3</sup>*J* = 7.9 Hz, H-3' and H-5'), 8.04 (2H, dd, *J* = 7.0 Hz, 3.2 Hz, H-2'' and H-6''), 8.46 (1H, s, NH); <sup>13</sup>C NMR (75 MHz, Me<sub>2</sub>SO-*d*<sub>6</sub>): δ 59.8 (C-4), 99.2 (C-7), 123.9 (q, <sup>1</sup>*J* = 271.5 Hz, CF<sub>3</sub>), 125.8 (q, <sup>3</sup>*J* = 3.9 Hz, C-3'' and C-5''), 126.3, 126.7, 128.4, 128.9, 129.1 (d, <sup>2</sup>*J* = 32 Hz, C-4''), 137.0 (C-4'), 144.4 (C-1'), 154.4 (br, C-2), 157.4 (C-9a), 161.2 (C-6), 162.0 (C-8). HPLC: purity 99.4%, *t*<sub>R</sub> 24.0 min (MeOH:H<sub>2</sub>O).

**General methods for the synthesis of 2,8-disubstituted-4-aryl-3,4-dihydropyrimido[1,2-*a*][1,3,5]triazin-6-ones (5af-5az)**

Procedure 1: To a stirred suspension of **4** (1.05-1.20 mmol) in ethanol (5 ml), an appropriate amount of aldehyde (1.26-1.44 mmol) and piperidine (0.48-0.60 mmol) was added. The reaction mixture was heated under reflux. After 2 hours, more amount (up to 0.5 equivalent) of the aldehyde was added to facilitate the completion of reaction. The reaction mixture was refluxed until the TLC showed no spot for the starting material (4-12 h). The reaction mixture was concentrated under vacuum, filtered, and washed with diethyl ether. The product was then recrystallized from appropriate solvent.

Procedure 2: A mixture of guanidine **4** (1.2 mmol), piperidine (0.25 mmol) and appropriate aldehyde (1.5 mmol) in 1.5 mL of absolute ethanol was irradiated in a 10mL vial using a Biotage microwave synthesizer for 20 min at 140°C. After removing solvent under vacuum the crude product was washed with diethyl ether and filtered.

**2-(*N,N*-Dimethylamino)-8-methyl-4-phenyl-3,4-dihydropyrimido[1,2-*a*][1,3,5]triazin-6-one (5af)**

mp 290-291°C (MeOH); TLC (silica gel, MeOH:CH<sub>2</sub>Cl<sub>2</sub>, 1:6): *R*<sub>f</sub> 0.45; MS (ESI) *m/z* 284.1 (MH<sup>+</sup>); Anal. Calcd. C, 63.59; H, 6.05; N, 24.72; found C, 63.48; H, 5.78; N, 24.66. <sup>1</sup>H NMR (300 MHz, Me<sub>2</sub>SO-*d*<sub>6</sub>): δ 2.07 (3H, s, Me) 3.02 (6H, s, N(Me)<sub>2</sub>), 5.74 (1H, s, H-7), 6.84 (1H, d, <sup>3</sup>*J* = 3.4 Hz, H-4), 7.17 (2H, d, <sup>3</sup>*J* = 6.8 Hz, H-2' and H-6'), 7.43 (3H, m, H-3', H-4' and H-5'), 8.74 (1H, d, <sup>3</sup>*J* = 3.4 Hz, NH); <sup>13</sup>C NMR (75 MHz, Me<sub>2</sub>SO-*d*<sub>6</sub>): δ 23.7 (Me), 36.6 (N(Me)<sub>2</sub>), 59.6 (C-4), 102.1 (C-7), 125.1 (C-2' and C-6'), 128.5 (C-4'), 128.6 (C-3' and C-5'), 139.5 (C-1'), 153.5 (C-2), 155.6 (C-9a), 160.4 (C-6), 165.7 (C-8). HPLC: purity 100%, *t*<sub>R</sub> 14.8 min (MeOH:H<sub>2</sub>O).

**2-(*N,N*-Dimethylamino)-8-methyl-4-(4-methylphenyl)-3,4-dihydropyrimido[1,2-*a*][1,3,5]triazin-6-one (5ag)**

mp 288-289°C (AcOEt); TLC (silica gel, MeOH:CH<sub>2</sub>Cl<sub>2</sub>, 1:6): *R*<sub>f</sub> 0.49; MS (ESI) *m/z* 298.1 (MH<sup>+</sup>); Anal. Calcd. C, 64.63; H, 6.44; N, 23.55; found C, 64.44; H, 6.81; N, 21.35. <sup>1</sup>H NMR (300 MHz, Me<sub>2</sub>SO-*d*<sub>6</sub>): δ 2.06 (3H, s, 8-Me), 2.26 (3H, s, *p*-Me) 3.01 (6H, s, N(Me)<sub>2</sub>), 5.73 (1H, s, H-7), 6.80 (1H, s, H-4), 7.06 (2H, d, <sup>3</sup>*J* = 7.9 Hz, H-2' and H-6'), 7.16 (2H, d, <sup>3</sup>*J* = 7.9 Hz, H-3' and H-5'), 8.68 (1H, s, NH). <sup>13</sup>C NMR (75 MHz, Me<sub>2</sub>SO-*d*<sub>6</sub>): δ 20.5 (Me), 23.8 (8-Me), 36.6 (N(Me)<sub>2</sub>), 59.5 (C-4), 102.1 (C-7), 125.1 (C-2' and C-6'), 129.0 (C-3' and C-5'), 136.6 (C-1'), 137.8 (C-4'), 153.5 (C-2), 155.7 (C-9a), 160.4 (C-6), 165.8 (C-8). HPLC: purity 100%, *t*<sub>R</sub> 16.6 min (MeOH:H<sub>2</sub>O).

*2-(N,N-Dimethylamino)-4-(4-methoxyphenyl)-8-methyl-3,4-dihydropyrimido[1,2-a][1,3,5]triazin-6-one*  
**(5ah)**

mp 280-281°C (AcOEt:EtOH); TLC (silica gel, MeOH:CH<sub>2</sub>Cl<sub>2</sub>, 1:6): *R<sub>f</sub>* 0.48; MS (ESI) *m/z* 314.0 (MH<sup>+</sup>); Anal. Calcd. C, 61.33; H, 6.11; N, 22.35; found C, 61.32; H, 5.65; N, 22.44. <sup>1</sup>H NMR (300 MHz, Me<sub>2</sub>SO-*d*<sub>6</sub>): δ 2.06 (3H, s, Me), 3.02 (6H, s, N(Me)<sub>2</sub>), 3.71 (3H, s, OMe), 5.72 (1H, s, H-7), 6.79 (1H, d, <sup>3</sup>*J* = 3.4 Hz, H-4), 6.90 (2H, d, <sup>3</sup>*J* = 8.7 Hz, H-3' and H-5'), 7.10 (2H, d, <sup>3</sup>*J* = 8.7 Hz, H-2' and H-6'), 8.67 (1H, d, <sup>3</sup>*J* = 3.4 Hz, NH). <sup>13</sup>C NMR (75 MHz, Me<sub>2</sub>SO-*d*<sub>6</sub>): δ 23.7 (Me), 36.6 (N(Me)<sub>2</sub>), 55.1 (OMe), 59.4 (C-4), 102.1 (C-7), 113.9 (C-3' and C-5'), 126.5 (C-2' and C-6'), 131.6 (C-1'), 153.5 (C-2), 155.7 (C-9a), 159.2 (C-4'), 160.4 (C-6), 165.7 (C-8). HPLC: purity 100% *t<sub>R</sub>* 15.0 min (MeOH:H<sub>2</sub>O); purity 100%, *t<sub>R</sub>* 8.0 min (CH<sub>3</sub>CN:H<sub>2</sub>O).

*2-(N,N-Dimethylamino)-4-(4-fluorophenyl)-8-methyl-3,4-dihydropyrimido[1,2-a][1,3,5]triazin-6-one*  
**(5ai)**

mp 287-288°C (AcOEt:EtOH), TLC (silica gel, MeOH:CH<sub>2</sub>Cl<sub>2</sub>, 1:9): *R<sub>f</sub>* 0.70; MS (ESI) *m/z* 302.1 (MH<sup>+</sup>); Anal. Calcd. C, 59.79; H, 5.35; N, 23.24; found C, 59.67; H, 5.29; N, 23.12. <sup>1</sup>H NMR (300 MHz, Me<sub>2</sub>SO-*d*<sub>6</sub>): δ 2.07 (3H, s, Me), 3.03 (6H, s, N(Me)<sub>2</sub>), 5.74 (1H, s, H-7), 6.83 (1H, s, H-4), 7.11-7.33 (4H, m, H-2', H-3', H-5' and H-6'), 8.72 (1H, br s, NH). <sup>13</sup>C NMR (75 MHz, Me<sub>2</sub>SO-*d*<sub>6</sub>): 23.1 (Me), 36.0 (N(Me)<sub>2</sub>), 58.6 (C-4), 101.5 (C-7), 114.8 (d, <sup>2</sup>*J*<sub>C-F</sub> = 21.8 Hz, C-3' and C-5'), 126.8 (d, <sup>3</sup>*J*<sub>C-F</sub> = 8.2 Hz, C-2' and C-6'), 135.6 (d, <sup>4</sup>*J*<sub>C-F</sub> = 3.5 Hz, C-1'), 152.7 (C-2), 154.9 (C-9a), 159.8 (C-6), 162.1 (d, <sup>1</sup>*J*<sub>C-F</sub> = 245.1 Hz, C-4'), 165.3 (C-8). HPLC: purity 100%, *t<sub>R</sub>* 16.1 min (MeOH:H<sub>2</sub>O).

*2-(N,N-Dimethylamino)-8-methyl-4-(4-trifluoromethylphenyl)-3,4-dihydropyrimido[1,2-a][1,3,5]triazin-6-one*  
**(5aj)**

mp 270-271°C (AcOEt); TLC (silica gel, MeOH:CH<sub>2</sub>Cl<sub>2</sub>, 1:6): *R<sub>f</sub>* 0.54; MS (ESI) *m/z* 352.1 (MH<sup>+</sup>); <sup>1</sup>H NMR (300 MHz, Me<sub>2</sub>SO-*d*<sub>6</sub>): δ 2.08 (3H, s, Me), 3.03 (6H, s, N(Me)<sub>2</sub>), 5.77 (1H, s, H-7), 6.90 (1H, d, <sup>3</sup>*J* = 4.9 Hz, H-4), 7.40 (2H, d, <sup>3</sup>*J* = 7.9 Hz, H-2' and H-6'), 7.77 (2H, d, <sup>3</sup>*J* = 7.9 Hz, H-3' and H-5'), 8.81 (1H, d, <sup>3</sup>*J* = 4.9 Hz, NH). <sup>13</sup>C NMR (75 MHz, Me<sub>2</sub>SO-*d*<sub>6</sub>): δ 23.9 (Me), 36.8 (N(Me)<sub>2</sub>), 59.4 (C-4), 102.2 (C-7), 124.0 (q, <sup>1</sup>*J*<sub>C-F</sub> = 274.0 Hz, CF<sub>3</sub>), 125.8 (q, <sup>3</sup>*J*<sub>C-F</sub> = 3.7 Hz, C-3' and C-5'), 126.3 (C-2' and C-6'), 129.1 (q, <sup>2</sup>*J*<sub>C-F</sub> = 31.8 Hz, C-4'), 144.0 (C-1'), 153.5 (C-2), 155.6 (C-9a), 160.6 (C-6), 166.3 (C-8). HPLC: purity 99.5%, *t<sub>R</sub>* 20.3 min (MeOH:H<sub>2</sub>O).

*4-(4-Cyanophenyl)-2-(N,N-dimethylamino)-8-methyl-3,4-dihydropyrimido[1,2-a][1,3,5]triazin-6-one*  
**(5ak)**

mp 243-244°C (CH<sub>2</sub>Cl<sub>2</sub>-MeOH); TLC (silica gel, MeOH:CH<sub>2</sub>Cl<sub>2</sub>, 1:6): *R<sub>f</sub>* 0.41; MS (ESI) *m/z* 309.0 (MH<sup>+</sup>). <sup>1</sup>H NMR (300 MHz, Me<sub>2</sub>SO-*d*<sub>6</sub>): δ 2.09 (3H, s, Me), 3.03 (6H, s, N(Me)<sub>2</sub>), 5.78 (1H, s, H-7), 6.90 (1H, s, H-4), 7.36 (2H, d, <sup>3</sup>*J* = 8.2 Hz, H-2' and H-6'), 7.86 (2H, d, <sup>3</sup>*J* = 8.2 Hz, H-3' and H-5'), 8.82 (1H, s, NH). <sup>13</sup>C NMR (75 MHz, Me<sub>2</sub>SO-*d*<sub>6</sub>): δ 23.8 (Me), 36.7 (N(Me)<sub>2</sub>), 59.4 (C-4), 102.1 (C-7), 111.3 (C-4'), 118.3 (CN), 126.3 (C-2' and C-6'), 132.8 (C-3' and C-5'), 144.6 (C-1'), 153.3 (C-2), 155.5 (C-9a), 160.4 (C-6), 166.1 (C-8). HPLC: purity 100%, *t<sub>R</sub>* 13.1 min (MeOH:H<sub>2</sub>O).

*2-(N,N-Dimethylamino)-4-(furan-2-yl)-8-methyl-3,4-dihydropyrimido[1,2-a][1,3,5]triazin-6-one*  
**(5al)**

mp 249-250°C, TLC (silica gel, MeOH:CH<sub>2</sub>Cl<sub>2</sub>, 1:6): *R<sub>f</sub>* 0.39; MS (ESI) *m/z* 274.1 (MH<sup>+</sup>); Anal. Calcd. C, 57.13; H, 5.53; N, 25.63; found C, 57.19; H, 5.57; N, 25.57. <sup>1</sup>H NMR (300 MHz, Me<sub>2</sub>SO-*d*<sub>6</sub>): δ 2.05 (3H, s, Me), 3.03 (6H, s, N(Me)<sub>2</sub>), 5.70 (1H, s, H-7), 6.18 (1H, d, *J* = 3.0 Hz, H-3'), 6.33-6.44 (1H, m, H-4'), 6.85 (1H, s, H-4), 7.59-7.61 (1H, m, H-5'), 8.64 (1H, s, NH). <sup>13</sup>C NMR (75 MHz, Me<sub>2</sub>SO-*d*<sub>6</sub>): δ 23.8 (Me), 36.7 (N(Me)<sub>2</sub>), 55.9 (C-4), 102.1 (C-7), 107.3 (C-3'), 110.4 (C-4'), 143.2 (C-5'), 151.1 (C-2'), 153.1 (C-2), 155.7 (C-9a), 159.9 (C-6), 165.9 (C-8). HPLC: purity 100%, *t<sub>R</sub>* 11.9 min (MeOH:H<sub>2</sub>O).

*2-(N,N-Dimethylamino)-8-methyl-4-(pyridin-2-yl)-3,4-dihydropyrimido[1,2-a][1,3,5]triazin-6-one (5am)*

mp 288-289°C (MeOH), TLC (silica gel, MeOH:CH<sub>2</sub>Cl<sub>2</sub>, 1:6): *R<sub>f</sub>* 0.61; MS (ESI) *m/z* 285.1 (MH<sup>+</sup>); Anal. Calcd. C, 59.14; H, 5.67; N, 29.56; found C, 58.73; H, 5.49; N, 29.53. <sup>1</sup>H NMR (300 MHz, Me<sub>2</sub>SO-*d*<sub>6</sub>): δ 2.06 (3H, s, 8-Me), 2.99 (6H, s, N(Me)<sub>2</sub>), 5.69 (1H, s, H-7), 6.79 (1H, s, H-4), 7.24-7.41 (2H, m, H-3' 5'), 7.81 (1H, dt, *J* = 7.7 Hz, 1.51 Hz, H-4'), 8.49 (1H, d, *J* = 4.1 Hz, H-6'), 8.75 (1H, br s., NH). HPLC: purity 100%, *t<sub>R</sub>* 12.7 min (MeOH:H<sub>2</sub>O); purity 100%, *t<sub>R</sub>* min (CH<sub>3</sub>CN:H<sub>2</sub>O).

*4-(4-Chlorophenyl)-2-(N,N-dimethylamino)-8-methyl-3,4-dihydropyrimido[1,2-a][1,3,5]triazin-6-one (5an)*

mp 289-290°C (AcOEt:EtOH); TLC (silica gel, MeOH:CH<sub>2</sub>Cl<sub>2</sub>, 1:6): *R<sub>f</sub>* 0.52; MS (ESI) *m/z* 317.9 (MH<sup>+</sup>); Anal. Calcd. C, 56.69; H, 5.08; N, 22.04; found C, 56.46; H, 5.19; N, 21.86. <sup>1</sup>H NMR (300 MHz, Me<sub>2</sub>SO-*d*<sub>6</sub>): δ 2.07 (3H, s, Me), 3.02 (6H, s, N(Me)<sub>2</sub>), 5.75 (1H, s, H-7), 6.82 (1H, s, H-4), 7.18 (2H, d, <sup>3</sup>*J* = 8.7 Hz, H-2' and H-6'), 7.44 (2H, d, <sup>3</sup>*J* = 8.7 Hz, H-3' and H-5'), 8.74 (1H, s, NH). <sup>13</sup>C NMR (75 MHz, Me<sub>2</sub>SO-*d*<sub>6</sub>): δ 23.6 (Me), 36.6 (N(Me)<sub>2</sub>), 59.3 (C-4), 102.1 (C-7), 127.1 (C-2' and C-6'), 128.7 (C-3' and C-5'), 133.1 (C-4'), 138.5 (C-1'), 153.3 (C-2), 155.5 (C-9a), 160.3 (C-6), 165.7 (C-8). HPLC: purity 100%, *t<sub>R</sub>* 19.0 min (MeOH:H<sub>2</sub>O); purity 100%, *t<sub>R</sub>* 12.8 min (CH<sub>3</sub>CN:H<sub>2</sub>O).

*4-(4-Bromophenyl)-2-(N,N-dimethylamino)-8-methyl-3,4-dihydropyrimido[1,2-a][1,3,5]triazin-6-one (5ao)*

mp 296-297°C (AcOEt:EtOH), TLC (silica gel, MeOH:CH<sub>2</sub>Cl<sub>2</sub>, 1:9): *R<sub>f</sub>* 0.71; MS (ESI) *m/z* 363.1 (MH<sup>+</sup>); Anal. Calcd. C, 49.74; H, 4.45; N, 19.33; found C, 49.93; H, 4.53; N, 19.28. <sup>1</sup>H NMR (300 MHz, Me<sub>2</sub>SO-*d*<sub>6</sub>): δ 2.07 (3H, s, Me), 3.02 (6H, s, N(Me)<sub>2</sub>), 5.75 (1H, s, H-7), 6.81 (1H, s, H-4), 7.13 (2H, d, <sup>3</sup>*J* = 8.3 Hz, H-2' and H-6'), 7.58 (2H, d, <sup>3</sup>*J* = 7.9 Hz, H-3' and H-5'), 8.73 (1H, br s, NH). <sup>13</sup>C NMR (75 MHz, Me<sub>2</sub>SO-*d*<sub>6</sub>): 23.9 (Me), 36.7 (N(Me)<sub>2</sub>), 59.4 (C-4), 102.1 (C-7), 121.7, 127.5, 131.6 (C-4'), 139.0 (C-1'), 153.4 (C-2), 155.6 (C-9a), 160.4 (C-6), 166.1 (C-8). HPLC: purity 100%, *t<sub>R</sub>* 18.8 min (MeOH:H<sub>2</sub>O).

*2-(N,N-Dimethylamino)-8-methyl-4-(4-hydroxyphenyl)-3,4-dihydropyrimido[1,2-a][1,3,5]triazin-6-one (5ap)*

mp 271-272°C (MeOH), TLC (silica gel, MeOH:CH<sub>2</sub>Cl<sub>2</sub>, 1:6): *R<sub>f</sub>* 0.28; MS (ESI) *m/z* 300.0 (MH<sup>+</sup>); Anal. Calcd. C, 60.19; H, 5.72; N, 23.40; found C, 59.71; H, 5.81; N, 23.19. <sup>1</sup>H NMR (300 MHz, Me<sub>2</sub>SO-*d*<sub>6</sub>): δ 2.05 (3H, s, 8-Me), 3.02 (6H, s, N(Me)<sub>2</sub>), 5.70 (1H, s, H-7), 6.71 (2H, d, *J* = 8.3 Hz, H-3' and H-5'), 6.74 (1H, d, *J* = 4.9 Hz, H-4), 6.98 (2H, d, *J* = 8.3 Hz, H-2' and H-6'), 8.61 (1H, d, *J* = 4.9 Hz, NH), 9.54 (1H, s, OH).

*8-Methyl-2-morpholino-4-phenyl-3,4-dihydropyrimido[1,2-a][1,3,5]triazin-6-one (5aq)*

mp 272-273°C (EtOH); TLC (silica gel, MeOH:CH<sub>2</sub>Cl<sub>2</sub>, 1:9): *R<sub>f</sub>* 0.48; MS (ESI) *m/z* 326.1 (MH<sup>+</sup>); Anal. Calcd. C, 62.75; H, 5.89; N, 21.52; found C, 62.51; H, 5.80; N, 21.35. <sup>1</sup>H NMR (300 MHz, Me<sub>2</sub>SO-*d*<sub>6</sub>): 2.08 (3H, s, Me), 3.36-3.71 (8H, m, morpholino), 5.79 (1H, s, H-7), 6.87 (1H, br s, H-4), 7.18 (2H, d, *J* = 7.5 Hz, H-2' and H-6'), 7.30-7.40 (3H, m, H-3', H-4' and H-5'), 8.91 (1H, br s, NH); <sup>13</sup>C NMR (75 MHz, Me<sub>2</sub>SO-*d*<sub>6</sub>): 23.8 (8-Me), 44.5 (C-2'' and C-6''), 59.6 (C-4), 65.6 (C-3'' and C-5''), 102.6 (C-7), 125.1 (C-2' and C-6'), 128.5 (C-4'), 128.6 (C-3' and C-5'), 139.3 (C-1'), 153.5 (C-2), 155.1 (C-9a), 160.4 (C-6), 165.8 (C-8); IR (KBr); ν 3390 br NH, 2980 (CH), 1670 C=O, 1616, 1481, 1388, 1296, 1203, 966. HPLC: purity 98.4%, *t<sub>R</sub>* 15.2 min (MeOH:H<sub>2</sub>O).

**2-Morpholino-4-(methylphenyl)-8-methyl-3,4-dihydropyrimido[1,2-a][1,3,5]triazin-6-one (5ar)**

mp 211-212°C (AcOEt:EtOH); TLC (silica gel, MeOH:DCM, 1:9):  $R_f$  0.49; MS (ESI)  $m/z$  340.1 (MH<sup>+</sup>); Anal. Calcd. C, 63.70; H, 6.24; N, 20.64; found C, 61.88; H, 6.05; N, 19.87. <sup>1</sup>H NMR (300 MHz, Me<sub>2</sub>SO-*d*<sub>6</sub>): δ 2.07 (3H, s, 8-Me), 2.26 (3H, s, 4'-Me) 3.48-3.69 (8H, m, morpholino), 5.78 (1H, s, H-7), 6.83 (1H, s, H-4), 7.06 (2H, d, <sup>3</sup>*J* = 7.9 Hz, H-2' and H-6'), 7.16 (2H, d, <sup>3</sup>*J* = 7.9 Hz, H-3' and H-5'), 8.94 (1H, br s, NH). <sup>13</sup>C NMR (75 MHz, Me<sub>2</sub>SO-*d*<sub>6</sub>): 20.5 (4'-Me), 23.7 (8-Me), 44.5 (C-3'' and C-5''), 59.7 (C-4), 65.6 (C-2'' and C-6''), 102.6 (C-7), 125.1 (C-2' and C-6'), 129.1 (C-3' and C-5'), 136.5 (C-1'), 137.8 (C-4'), 153.5 (C-2), 155.0 (C-9a), 160.4 (C-6), 165.4 (C-8); IR (KBr); ν 3398 br NH, 2988 (CH), 1672 C=O, 1620, 1418, 1308, 1211, 967. HPLC: purity 99.6%,  $t_R$  17.6 min (MeOH:H<sub>2</sub>O).

**4-(4-Methoxyphenyl)-8-methyl-2-morpholino-3,4-dihydropyrimido[1,2-a][1,3,5]triazin-6-one (5as)**

mp 203-204°C (Ether); TLC (silica gel, MeOH:DCM, 1:9):  $R_f$  0.53; MS (ESI)  $m/z$  356.1 (MH<sup>+</sup>); Anal. Calcd. C, 60.83; H, 5.96; N, 19.71; found C, 60.26; H, 5.86; N, 19.39. <sup>1</sup>H NMR (300 MHz, Me<sub>2</sub>SO-*d*<sub>6</sub>): δ 2.07 (3H, s, Me), 3.46-3.67 (8H, m, morpholino), 3.72 (3H, s, OMe), 5.78 (1H, s, H-7), 6.83 (1H, s, H-4), 6.91 (2H, d, <sup>3</sup>*J* = 8.7 Hz, H-3' and H-5'), 7.12 (2H, d, <sup>3</sup>*J* = 8.7 Hz, H-2' and H-6'), 8.89 (1H, s, NH). <sup>13</sup>C NMR (75 MHz, Me<sub>2</sub>SO-*d*<sub>6</sub>): 23.7 (Me) 44.7 (C-3'' and C-5''), 55.1 (OMe), 59.4 (C-4), 65.7 (C-2'' and C-6''), 102.7 (C-7), 113.9 (C-3' and 5'), 126.5 (C-2' and C-6'), 131.4 (C-1'), 153.5 (C-2), 155.1 (C-9a), 159.3 (C-4'), 160.4 (C-6), 165.7 (C-8). HPLC: purity 100%,  $t_R$  15.3 min (MeOH:H<sub>2</sub>O).

**4-(4-Fluorophenyl)-8-methyl-2-morpholin-4-yl-3,4-dihydropyrimido[1,2-a][1,3,5]triazin-6-one (5at)**

mp 269-270°C (EtOH); TLC (silica gel, MeOH:DCM, 1:9):  $R_f$  0.51; MS (ESI)  $m/z$  344.1 (MH<sup>+</sup>); Anal. Calcd. C, 59.47; H, 5.28; N, 20.40; found C, 59.45; H, 5.26; N, 20.15. <sup>1</sup>H NMR (300 MHz, Me<sub>2</sub>SO-*d*<sub>6</sub>): δ 2.08 (3H, s, 8-Me), 3.49-3.70 (8H, m, morpholino), 5.79 (1H, s, H-7), 6.86 (1H, s, H-4), 7.15-7.30 (4H, m, H-2', H-3', H-5' and H-6'), 8.90 (1H, s, NH). <sup>13</sup>C NMR (75 MHz, Me<sub>2</sub>SO-*d*<sub>6</sub>): 23.7 (Me), 44.5 (C-3'' and C-5''), 59.2 (C-4), 65.6 (C-2'' and C-6''), 102.7 (C-7), 115.5 (d, <sup>2</sup>*J*<sub>C-F</sub> = 21.8 Hz, C-3' and C-5'), 127.4 (d, <sup>3</sup>*J*<sub>C-F</sub> = 8.8 Hz, C-2' and C-6'), 135.6 (d, <sup>4</sup>*J*<sub>C-F</sub> = 2.4 Hz, C-1'), 153.4 (C-2), 155.0 (C-9a), 160.3 (C-6), 161.9 (d, <sup>1</sup>*J*<sub>C-F</sub> = 245.2, C-4'), 165.9 (C-8). HPLC: purity 94.7%,  $t_R$  16.1 min (MeOH:H<sub>2</sub>O).

**8-Methyl-2-morpholino-(4-trifluoromethylphenyl)-3,4-dihydropyrimido[1,2-a][1,3,5]triazin-6-one (5au)**

mp 233-234°C (AcOEt); TLC (silica gel, MeOH:DCM, 1:9):  $R_f$  0.52; MS (ESI)  $m/z$  394.1 (MH<sup>+</sup>); Anal. Calcd. C, 54.96; H, 4.61; N, 17.80; found C, 54.80; H, 4.58; N, 17.73. <sup>1</sup>H NMR (300 MHz, Me<sub>2</sub>SO-*d*<sub>6</sub>): δ 2.10 (1H, s, Me) 3.48-3.71 (8H, m morpholino), 5.83 (1H, s, H-7), 6.94, (1H, s, H-4), 7.41 (2H, d, <sup>3</sup>*J* = 7.9 Hz, H-2' and H-6'), 7.77 (2H, d, <sup>3</sup>*J* = 7.9 Hz, H-3' and H-5'), 9.02 (1H, br s, NH). <sup>13</sup>C NMR (75 MHz, Me<sub>2</sub>SO-*d*<sub>6</sub>): 44.7 (C-3'' and C-5''), 60.1 (C-4), 65.6 (C-2'' and C-6''), 102.8 (C-7), 123.9 (q, <sup>1</sup>*J*<sub>C-F</sub> = 272.1 Hz, *p*-CF<sub>3</sub>), 125.8(q, <sup>3</sup>*J*<sub>C-F</sub> = 3.5 Hz, C-3' and C-5'), 126.2 (C-2' and C-6'), 129.1 (q, <sup>2</sup>*J*<sub>C-F</sub> = 31.8 Hz, C-4'), 143.9 (C-1'), 153.5 (C-2), 154.8 (C-9a), 160.3 (C-6), 165.9 (C-8). HPLC: purity 100%,  $t_R$  20.3 min (MeOH:H<sub>2</sub>O).

**4-(8-Methyl-2-morpholino-6-oxo-4,6-dihydro-3H-pyrimido[1,2-a][1,3,5]triazin-4-yl)benzotrile (5av)**

mp 269-270°C (MeOH); TLC (silica gel, AcOEt:Hexane, 8:2):  $R_f$  0.18; MS (ESI)  $m/z$  351.1 (MH<sup>+</sup>); Anal. Calcd. C, 61.70; H, 5.18; N, 23.99; found C, 61.60; H, 5.13; N, 23.72. <sup>1</sup>H NMR (300 MHz, Me<sub>2</sub>SO-*d*<sub>6</sub>): δ 2.09 (3H, s, Me), 3.48-3.69 (8H, m, morpholino), 5.82 (1H, s, H-7), 6.92 (1H, s, H-4), 7.35 (2H, d, <sup>3</sup>*J* = 8.3 Hz, H-2' and H-6'), 7.86 (2H, d, <sup>3</sup>*J* = 8.3 Hz, H-3' and H-5'), 8.99 (1H, s, NH). <sup>13</sup>C NMR (75 MHz, Me<sub>2</sub>SO-*d*<sub>6</sub>): 23.7 (Me), 44.7 (C-3'' and C-5''), 59.5 (C-4), 65.6 (C-2'' and C-6''), 102.7 (C-7), 111.4 (C-4'), 118.3 (CN), 126.3 (C-2' and C-6'), 132.8 (C-3' and C-5'), 144.5 (C-1'), 153.3 (C-2), 154.9 (C-9a), 160.3 (C-6), 166.1 (C-8). HPLC: purity 100%,  $t_R$  19.1 min (MeOH:H<sub>2</sub>O).

*4-(Furan-2-yl)-8-methyl-2-morpholino-3,4-dihydropyrimido[1,2-a][1,3,5]triazin-6-one (5aw)*

mp 262-263°C (EtOH); TLC (silica gel, MeOH:DCM, 1:9):  $R_f$  0.56; MS (ESI)  $m/z$  316.1 (MH<sup>+</sup>); Anal. Calcd. C, 57.13; H, 5.43; N, 22.21; found C, 56.88; H, 5.34; N, 21.80. <sup>1</sup>H NMR (300 MHz, Me<sub>2</sub>SO-*d*<sub>6</sub>): δ 2.05 (Me), 3.47-3.71 (8H, m, morpholino), 5.75 (1H, s, H-7), 6.21 (1H, d,  $J = 3.4$  Hz, H-3'), 6.36-6.44 (1H, m, H-4'), 6.88 (1H, s, H-4), 7.61 (1H, s, H-5'), 8.81 (1H, s, NH). <sup>13</sup>C NMR (75 MHz, Me<sub>2</sub>SO-*d*<sub>6</sub>): 23.7 (Me), 44.6 (C-3'' and C-5''), 54.9 (C-4), 65.6 (C-2'' and C-6''), 102.7 (C-7), 107.3 (C-3'), 110.5 (C-4'), 143.3 (C-2'), 150.9 (C-2'), 153.1 (C-2), 155.1 (C-9a), 159.8 (C-6), 165.8 (C-8); IR (KBr); ν 3420 br NH, 3176, 3138, 3116, 2993 (CH), 1670 C=O, 1616, 1525, 1479, 1384, 1286, 1199, 1149, 1111, 1008, 881, 761. HPLC: purity 99.8%,  $t_R$  12.1 min (MeOH:H<sub>2</sub>O).

*8-Methyl-2-morpholino-4-(thiophen-2-yl)-3,4-dihydropyrimido[1,2-a][1,3,5]triazin-6-one (5ax)*

mp 267-268°C (decomposed) (EtOH); TLC (silica gel, MeOH:DCM, 1:9):  $R_f$  0.41; MS (ESI)  $m/z$  332.1 (MH<sup>+</sup>); Anal. Calcd. C, 54.36; H, 5.17; N, 21.13, S, 9.68; found C, 54.23; H, 5.05; N, 21.09, S, 9.60. <sup>1</sup>H NMR (300 MHz, Me<sub>2</sub>SO-*d*<sub>6</sub>): δ 2.05 (3H, s, Me), 3.49-3.78 (8H, m, morpholino), 5.79 (1H, s, H-7), 6.89-7.00 (2H, m, H-4, H-4'), 7.06 (1H, m, H-3'), 7.45 (1H, dd,  $J = 4.9$  Hz,  $J = 1.1$  Hz, H-5'), 8.97 (1H, s, NH). <sup>13</sup>C NMR (75 MHz, Me<sub>2</sub>SO-*d*<sub>6</sub>): 23.6 (Me), 44.6 (C-3'' and C-5''), 56.9 (C-4), 65.7 (C-2'' and C-6''), 102.8 (C-7), 125.1, 126.3, 126.7, 142.8 (C-2'), 152.7 (C-2), 154.9 (C-9a), 160.0 (C-6), 165.8 (C-8); IR (KBr); ν 3400 br NH, 3097, 2991 (CH), 1674 C=O, 1620, 1530, 1477, 881, 760. HPLC: purity 99.4%,  $t_R$  14.1 min (MeOH:H<sub>2</sub>O).

*8-Methyl-2-morpholino-4-(pyridin-2-yl)-3,4-dihydropyrimido[1,2-a][1,3,5]triazin-6-one (5ay)*

mp 272-273°C (EtOH); 2.07 (Me), 3.43-3.71 (8H, m, morpholino), 5.75 (1H, s, H-7), 6.81 (1H, s, H-4), 7.30 (1H, d,  $J = 7.5$  Hz, H-3'), 7.35 (1H, m, H-5'), 7.82 (1H, t,  $J = 7.5$  Hz, H-4'), 8.50 (1H, d,  $J = 3.8$  Hz, H-6'), 8.86 (1H, s, NH). <sup>13</sup>C NMR (75 MHz, Me<sub>2</sub>SO-*d*<sub>6</sub>): 23.8 (Me), 44.6 (C-3'' and C-5''), 60.9 (C-4), 65.6 (C-2'' and C-6''), 102.5 (C-7), 120.4, 123.7, 137.2, 149.1 (C-2'), 153.7 (C-2), 155.2 (C-9a), 156.9, 160.5 (C-6), 165.7 (C-8). HPLC: purity 100%,  $t_R$  12.4 min (MeOH:H<sub>2</sub>O).

*4-(4-Bromophenyl)-8-methyl-2-morpholino-3,4-dihydro-pyrimido[1,2-a][1,3,5]triazin-6-one (5az)*

mp 245-246°C (MeOH); TLC (silica gel, MeOH:DCM, 1:9):  $R_f$  0.60; MS (ESI)  $m/z$  404.1, 406.1 (MH<sup>+</sup>); Anal. Calcd. C, 50.51; H, 4.49; N, 17.32; found C, 50.50; H, 4.27; N, 17.32. <sup>1</sup>H NMR (300 MHz, Me<sub>2</sub>SO-*d*<sub>6</sub>): δ 2.08 (3H, s, Me), 3.60 (8H, s, morpholino), 5.80 (1H, s, H-7), 6.83 (1H, s, H-4), 7.12 (2H, d,  $^3J = 8.7$  Hz, H-2' and H-6'), 7.58 (2H, d,  $^3J = 8.3$  Hz, H-3' and H-5'), 8.92 (1H, s, NH). <sup>13</sup>C NMR (75 MHz, Me<sub>2</sub>SO-*d*<sub>6</sub>): 23.8 (Me), 44.5 (C-3'' and C-5''), 59.3 (C-4), 65.6 (C-2'' and C-6''), 102.6 (C-7), 121.7 (C-4'), 127.4 (C-2' and C-6'), 131.6 (C-3' and C-5'), 138.7 (C-1'), 153.4 (C-2), 154.9 (C-9a), 160.3 (C-6), 165.9 (C-8). HPLC: purity 100%,  $t_R$  19.9 min (MeOH:H<sub>2</sub>O).

*General methods for the synthesis of 4-substituted 2-morpholino-8-trifluoromethyl-3,4-dihydropyrimido[1,2-a][1,3,5]triazin-6-ones (5ba-5bn)*

Procedure 1: The solution of *N*-(6-oxo-4-trifluoromethyl-1,6-dihydro-pyrimidin-2-yl)-morpholine-4-carboxamide **4** (0.50 g, 1.7 mmol), aldehydes (2.0 mmol) and piperidine (0.05 ml, 0.5 mmol) in ethanol (10 ml) was heated under reflux for 12-18 h. During halfway through the reaction period, additional aldehyde (up to 0.5 mmol) was added. The precipitate formed is filtered, washed with diethyl ether, dried and recrystallized from suitable solvents.

Procedure 2: A mixture of guanidine **4** (1.2 mmol), piperidine (0.25 mmol) and appropriate aldehyde (1.5 mmol) in 1.5 mL of absolute ethanol was irradiated in a 10 mL vial at 150°C for 20 min using a

Biotage microwave synthesizer. After removing solvent under vacuum the crude product was washed with diethyl ether and filtered.

*2-Morpholino-4-phenyl-8-trifluoromethyl-3,4-dihydropyrimido[1,2-a][1,3,5]triazin-6-one (5ba)*

mp 269-270°C (AcOEt); MS (APCI) *m/z*: 380.1 (MH<sup>+</sup>); Anal. Calcd. for C<sub>18</sub>H<sub>18</sub>F<sub>3</sub>N<sub>5</sub>O<sub>2</sub>: C, 53.83; H, 4.25; N, 18.46; found: C, 53.99; H, 3.90; N, 18.46. <sup>1</sup>H NMR (300 MHz, Me<sub>2</sub>SO-*d*<sub>6</sub>): δ 3.54-3.69 (8H, m, morpholino) 6.33 (1H, s, H-7), 6.91 (1H, br s, H-4), 7.22 (2H, d, *J* = 7.5 Hz, H-2' and H-6'), 7.35-7.43 (3H, m, H-3', H-4' and H-5'), 9.16 (1H, br s, NH); <sup>13</sup>C NMR (75 MHz, Me<sub>2</sub>SO-*d*<sub>6</sub>): 44.7 (C-2'' and C-6''), 60.3 (C-4), 65.6 (C-3'' and C-5''), 101.5 (q, <sup>3</sup>*J*<sub>C-F</sub> = 3.5 Hz, C-7), 120.8 (q, <sup>1</sup>*J*<sub>C-F</sub> = 275.4 Hz, CF<sub>3</sub>), 125.1 (C-3' and C-5'), 128.9 (C-2' and C-6'), 138.6 (C-1'), 153.4 (q, <sup>2</sup>*J*<sub>C-F</sub> = 33.7 Hz, C-8), 155.0, 155.3, 160.2 (C-6); IR (KBr); ν 3385 NH, 3014, 1675 C=O, 1499, 1307. HPLC: purity 100%, *t*<sub>R</sub> 11.9 min (MeOH:H<sub>2</sub>O).

*2-Morpholino-4-(4-methylphenyl)-8-trifluoromethyl-3,4-dihydropyrimido[1,2-a][1,3,5]triazin-6-one (5bb)*

mp 251-252°C (Diethyl ether); Anal. Calcd. for C<sub>18</sub>H<sub>18</sub>F<sub>3</sub>N<sub>5</sub>O<sub>2</sub>: C, 54.96; H, 4.61; N, 17.80. Found: C, 54.86; H, 4.17; N, 17.81. <sup>1</sup>H NMR (300 MHz, Me<sub>2</sub>SO-*d*<sub>6</sub>): δ 2.27 (1H, s, Me), 3.51-3.69 (8H, m, morpholino), 6.31 (1H, s, H-7), 6.87 (1H, s, H-4), 7.09 (2H, d, *J* = 7.5 Hz, H-3' and H-5'), 7.19 (2H, d, *J* = 7.5 Hz, H-2' and H-6'), 9.12 (1H, s, NH); <sup>13</sup>C NMR (75 MHz, Me<sub>2</sub>SO-*d*<sub>6</sub>): 44.6 (C-2'' and C-6''), 60.2 (C-4), 65.6 (C-3'' and C-5''), 101.4 (q, <sup>3</sup>*J*<sub>C-F</sub> = 2.5 Hz, C-7), 120.8 (q, <sup>1</sup>*J*<sub>C-F</sub> = 275.2 Hz, CF<sub>3</sub>), 125.0 (C-3' and C-5'), 129.3 (C-2' and C-6'), 135.7 (C-1'), 138.3 (C-4'), 153.3 (q, <sup>2</sup>*J*<sub>C-F</sub> = 33.0 Hz, C-8), 155.0, 155.3, 160.2 (C-6); IR (KBr); ν 3411 br NH, 2981 (CH), 2924, 2868, 1693 C=O, 1600, 1579, 1447, 1363, 1276, 906, 840, 790. HPLC: purity 100%, *t*<sub>R</sub> 13.7 min (MeOH:H<sub>2</sub>O).

*4-(4-Methoxyphenyl)-2-morpholino-8-trifluoromethyl-3,4-dihydropyrimido[1,2-a][1,3,5]triazin-6-one (5bc)*

mp 229-230°C (Diethyl ether); Anal. Calcd. for C<sub>18</sub>H<sub>18</sub>F<sub>3</sub>N<sub>5</sub>O<sub>3</sub>: C, 52.81; H, 4.43; N, 17.11; found: C, 52.96; H, 4.05; N, 17.10. <sup>1</sup>H NMR (300 MHz, Me<sub>2</sub>SO-*d*<sub>6</sub>): δ 3.54-3.69 (8H, m, morpholino), 3.73 (3H, s, OMe), 6.30 (1H, s, H-7), 6.86 (1H, s, H-4), 6.94 (2H, d, *J* = 8.7 Hz, H-3' and H-5'), 7.15 (2H, d, *J* = 8.7 Hz, H-2' and H-6'), 9.08 (1H, br s, NH). <sup>13</sup>C NMR (75 MHz, Me<sub>2</sub>SO-*d*<sub>6</sub>): 44.6 (C-2'' and C-6''), 55.1 (OMe), 60.1 (C-4), 65.6 (C-3'' and C-5''), 101.4 (q, <sup>3</sup>*J*<sub>C-F</sub> = 3.5 Hz, C-7), 114.2 (C-3' and C-5'), 120.8 (q, <sup>1</sup>*J*<sub>C-F</sub> = 275.4 Hz, CF<sub>3</sub>), 126.5 (C-2' and C-6'), 130.7 (C-1'), 153.3 (q, <sup>2</sup>*J*<sub>C-F</sub> = 33.5 Hz, C-8), 155.0, 155.2, 159.5 (C-4'), 160.2 (C-6). HPLC: purity 100%, *t*<sub>R</sub> 12.9 min (MeOH:H<sub>2</sub>O).

*4-(4-Fluorophenyl)-2-morpholino-8-trifluoromethyl-3,4-dihydropyrimido[1,2-a][1,3,5]triazin-6-one (5bd)*

mp 270-271°C (AcOEt:diethylether); Anal. Calcd. for C<sub>17</sub>H<sub>15</sub>F<sub>4</sub>N<sub>5</sub>O<sub>2</sub>: C, 51.39; H, 3.81; N, 17.63; found: C, 51.34; H, 3.41; N, 17.65. <sup>1</sup>H NMR (300 MHz, Me<sub>2</sub>SO-*d*<sub>6</sub>): δ 3.54-3.74 (8H, m, morpholino), 6.33 (1H, s, H-7), 6.90 (1H, d, *J* = 4.9 Hz, H-4), 7.20-7.30 (4H, m, H<sub>2'</sub>, H<sub>6'</sub>, H<sub>3'</sub> and H<sub>5'</sub>), 9.15 (1H, d, *J* = 4.9 Hz, NH). <sup>13</sup>C NMR (75 MHz, Me<sub>2</sub>SO-*d*<sub>6</sub>): 44.6 (C-2'' and C-6''), 59.8 (C-4), 65.5 (C-3'' and C-5''), 101.4 (q, <sup>3</sup>*J*<sub>C-F</sub> = 2.4 Hz, C-7), 115.7 (d, <sup>2</sup>*J*<sub>C-F</sub> = 21.8 Hz, C-3' and C-5'), 120.8 (q, <sup>1</sup>*J*<sub>C-F</sub> = 278.1 Hz, CF<sub>3</sub>), 127.4 (d, <sup>3</sup>*J*<sub>C-F</sub> = 8.8 Hz, C-2' and C-6'), 134.8 (d, <sup>4</sup>*J*<sub>C-F</sub> = 2.9 Hz, C-1'), 153.3 (q, <sup>2</sup>*J*<sub>C-F</sub> = 33.3 Hz, C-8), 154.8, 155.1, 160.2 (C-6), 162.0 (d, <sup>1</sup>*J*<sub>C-F</sub> = 245.2 Hz, C-4'). HPLC: purity 100%, *t*<sub>R</sub> 12.6 min (MeOH:H<sub>2</sub>O).

*2-Morpholino-8-trifluoromethyl-4-(4-trifluoromethylphenyl)-3,4-dihydropyrimido[1,2-a][1,3,5]triazin-6-one (5be)*

mp 288-289°C (AcOEt); Anal. Calcd. for C<sub>18</sub>H<sub>15</sub>F<sub>6</sub>N<sub>5</sub>O<sub>2</sub>: C, 48.33; H, 3.38; N, 15.66. Found: C, 48.57; H, 3.14; N, 15.79. <sup>1</sup>H NMR (300 MHz, Me<sub>2</sub>SO-*d*<sub>6</sub>): 3.52-3.75 (8H, m, morpholino), 6.36 (1H, s, H-7),

6.99 (2H, d,  $J = 4.2$  Hz, H-4), 7.45 (2H, d,  $J = 8.3$  Hz, H-3' and H-5'), 7.80 (2H, d,  $J = 8.3$  Hz, H-2' and H-6'), 9.23 (d,  $J = 4.2$  Hz, NH).  $^{13}\text{C}$  NMR (75 MHz,  $\text{Me}_2\text{SO}-d_6$ ): 44.7 (C-2'' and C-6''), 60.1 (C-4), 65.6 (C-3'' and C-5''), 101.6 (q,  $^3J_{\text{C-F}} = 2.4$  Hz, C-7), 120.8 (q,  $^1J_{\text{C-F}} = 275.8$  Hz, 8-CF<sub>3</sub>), 123.8 (q,  $^1J_{\text{C-F}} = 272.3$  Hz, 4'-CF<sub>3</sub>), 126.0 (q,  $^3J_{\text{C-F}} = 3.3$  Hz, C-3' and C-5'), 126.2 (C-2' and C-6'), 129.4 (q,  $^2J_{\text{C-F}} = 31.8$  Hz, C-4'), 143.0 (C-1'), 153.5 (q,  $^2J_{\text{C-F}} = 33.7$  Hz, C-8), 154.9, 155.2, 160.3 (C-6); IR (KBr);  $\nu$  3396 br NH, 2982 (CH), 1693 C=O, 1604, 1581, 1417, 1336, 1278. HPLC: purity 98.3%,  $t_{\text{R}}$  20.4 min ( $\text{MeOH}:\text{H}_2\text{O}$ ); purity 100%,  $t_{\text{R}}$  7.4 min ( $\text{CH}_3\text{CN}:\text{H}_2\text{O}$ ).

*2-Morpholino-4-(furan-2-yl)-8-trifluoromethyl-3,4-dihydropyrimido[1,2-a][1,3,5]triazin-6-one (5bf)*

mp 255-256°C ( $\text{CH}_2\text{Cl}_2$ ); Anal. Calcd. for  $\text{C}_{15}\text{H}_{14}\text{F}_3\text{N}_5\text{O}_3$ : C, 48.78; H, 3.82; N, 18.96; found: C, 48.79; H, 3.92; N, 18.63.  $^1\text{H}$  NMR (300 MHz,  $\text{Me}_2\text{SO}-d_6$ ):  $\delta$  3.57-3.70 (8H, m, morpholino), 6.24 (1H, s, H-7), 6.31 (1H, d,  $J = 3.4$  Hz, H-3'), 6.43 (1H, dd,  $J = 3.0$  Hz, 1.9 Hz, H-4'), 6.93 (1H, s, H-4), 7.64 (1H, d,  $J = 1.1$  Hz, H-5'), 9.09 (1H, d,  $J = 4.9$  Hz, NH); IR (KBr);  $\nu$  3253 NH, 3147, 2970, 2843, 1657 br C=O, 1490, 1209, 1114, 1006, 958, 904, 819. HPLC: purity 95.4%,  $t_{\text{R}}$  8.6 min ( $\text{CH}_3\text{CN}:\text{H}_2\text{O}$ ).

*2-Morpholino-4-(4-nitrophenyl)-8-trifluoromethyl-3,4-dihydropyrimido[1,2-a][1,3,5]triazin-6-one (5bg)*

mp 294-295°C (AcOEt); TLC (silica gel, AeOEt:Hexane, 8:2):  $R_f$  0.3.  $^1\text{H}$  NMR (300 MHz,  $\text{Me}_2\text{SO}-d_6$ ):  $\delta$  3.64-3.70 (8H, m, morpholino), 6.37 (1H, s, H-7), 7.02 (1H, d,  $^3J = 4.5$  Hz, H-4), 7.51 (2H, d,  $^3J = 8.7$  Hz, H-2' and H-6'), 8.27 (2H, d,  $^3J = 8.7$  Hz, H-3' and H-5'), 9.25 (1H, d,  $^3J = 4.5$  Hz, NH).  $^{13}\text{C}$  NMR (75 MHz,  $\text{Me}_2\text{SO}-d_6$ ): 44.7 (C-3'' and C-5''), 60.0 (C-4), 65.6 (C-2'' and C-6''), 101.7 (q,  $^3J_{\text{C-F}} = 2.9$  Hz, C-7), 120.8 (q,  $^1J_{\text{C-F}} = 275.8$  Hz, CF<sub>3</sub>), 124.2 (C-2' and C-6'), 126.8 (C-3' and C-5'), 145.4 (C-1'), 147.7 (C-4'), 153.5 (q,  $^2J_{\text{C-F}} = 33.5$  Hz, C-8), 154.8, 155.2, 160.3 (C-6).

*2-Morpholino-4-(pyridin-2-yl)-8-(trifluoromethyl)-3,4-dihydropyrimido[1,2-a][1,3,5]triazin-6-one (5bh)*

mp 260-261°C ( $\text{CH}_2\text{Cl}_2$ ); MS (APCI)  $m/z$ : 381.5 ( $\text{MH}^+$ ); Anal. Calcd. for  $\text{C}_{16}\text{H}_{15}\text{F}_3\text{N}_6\text{O}_2$ : C, 50.53; H, 3.98; N, 22.10; found: C, 50.29; H, 3.83; N, 21.93.  $^1\text{H}$  NMR (300 MHz,  $\text{Me}_2\text{SO}-d_6$ ):  $\delta$  3.50-3.71 (8H, m, morpholino), 6.27 (1H, s, H-7), 6.88 (1H, d,  $J = 4.5$  Hz, H-4), 7.34-7.46 (2H, m, H-4' and H-5'), 7.88 (1H, dt,  $J = 7.9$  Hz, 1.5 Hz, H-4'), 8.50 (1H, d,  $J = 4.5$  Hz, H-3'), 9.08 (1H, d,  $J = 4.9$  Hz, NH).  $^{13}\text{C}$  NMR (75 MHz,  $\text{Me}_2\text{SO}-d_6$ ): 44.7 (C-2'' and C-6''), 61.4 (C-4), 65.6 (C-3'' and C-5''), 101.3 (q,  $^4J_{\text{C-F}} = 1.7$  Hz, C-7), 120.8, 120.9 (q,  $^1J_{\text{C-F}} = 275.1$  Hz, CF<sub>3</sub>), 124.1, 137.5, 149.2 (C-1'), 153.3 (q,  $^2J_{\text{C-F}} = 33.2$  Hz, C-8), 155.1 (C-2), 155.6 (C-2'), 156.1 (C-9a), 160.4 (C-6); IR (KBr);  $\nu$  3357 NH, 3068, 2970, 2845, 1656 C=O, 1208, 1070, 908. HPLC: purity 99.2%,  $t_{\text{R}}$  6.2 min ( $\text{CH}_3\text{CN}:\text{H}_2\text{O}$ ).

*4-(4-Bromophenyl)-2-morpholino-8-trifluoromethyl-3,4-dihydropyrimido[1,2-a][1,3,5]triazin-6-one (5bi)*

mp 270-271°C (AcOEt); MS (APCI)  $m/z$ : 458.2 ( $\text{MH}^+$ ); Anal. Calcd. for  $\text{C}_{17}\text{H}_{15}\text{BrF}_3\text{N}_5\text{O}_2$ : C, 44.56; H, 3.30; N, 15.28; found: C, 44.84; H, 3.48; N, 15.33.  $^1\text{H}$  NMR (300 MHz,  $\text{Me}_2\text{SO}-d_6$ ):  $\delta$  3.54-3.69 (8H, m, morpholino), 6.34 (1H, s, H-7), 6.88 (1H, s, H-4), 7.18 (2H, d,  $J = 8.3$  Hz, H-3' and H-5'), 7.61 (2H, d,  $J = 8.3$  Hz, H-2' and H-6'), 9.16 (1H, br s, NH).  $^{13}\text{C}$  NMR (75 MHz,  $\text{Me}_2\text{SO}-d_6$ ): 44.7 (C-2'' and C-6''), 60.0 (C-4), 65.6 (C-3'' and C-5''), 101.5 (q,  $^3J_{\text{C-F}} = 2.4$  Hz, C-7), 120.8 (q,  $^1J_{\text{C-F}} = 275.2$  Hz, CF<sub>3</sub>), 122.2, 127.5 (C-3' and C-5'), 131.9 (C-2' and C-6'), 138.0 (C-1'), 153.3 (q,  $^2J_{\text{C-F}} = 33.5$  Hz, C-8), 154.9, 155.2, 160.2 (C-6); IR (KBr)  $\nu$  3333 NH, 2991 CH, 1674 C=O, 1660, 1613. HPLC: purity 100%,  $t_{\text{R}}$  17.9 min ( $\text{MeOH}:\text{H}_2\text{O}$ ); purity 100%,  $t_{\text{R}}$  7.9 min ( $\text{CH}_3\text{CN}:\text{H}_2\text{O}$ ).

*4-(2-Morpholino-6-oxo-8-trifluoromethyl-4,6-dihydro-3H-pyrimido[1,2-a][1,3,5]triazin-4-yl)benzotrile (5bj)*

mp 269-270°C (AcOEt); Anal. Calcd. for  $\text{C}_{18}\text{H}_{15}\text{F}_3\text{N}_6\text{O}_2$ : C, 53.47; H, 3.74; N, 20.78. Found: C, 53.59; H, 3.91; N, 20.89.  $^1\text{H}$  NMR (300 MHz,  $\text{Me}_2\text{SO}-d_6$ ):  $\delta$  3.54-3.73 (8H, m, morpholino), 6.36 (1H, s, H-7), 6.97 (1H, s, H-4), 7.41 (2H, d,  $J = 8.3$  Hz, H-3' and H-5'), 7.89 (2H, d,  $J = 8.3$  Hz, H-2' and H-6'), 9.23

(1H, br s, NH);  $^{13}\text{C}$  NMR (75 MHz,  $\text{Me}_2\text{SO}-d_6$ ): 44.7 (C-2'' and C-6''), 60.1 (C-4), 65.6 (C-3'' and C-5''), 101.6 (q,  $^4J_{\text{C-F}} = 2.4$  Hz, C-7), 111.8 (C-4'), 118.2 (CN), 120.8 (q,  $^1J_{\text{C-F}} = 275.6$  Hz,  $\text{CF}_3$ ), 126.3 (C-2' and C-6'), 133.0 (C-3' and C-5'), 143.6 (C-1'), 153.5 (q,  $^2J_{\text{C-F}} = 33.5$  Hz, C-8), 154.8, 155.1, 160.3 (C-6). HPLC: purity 98.9%,  $t_{\text{R}}$  12.2 min (MeOH:H<sub>2</sub>O).

**8-Methyl-2-pyrrolidino-4-(4-methylphenyl)-3,4-dihydropyrimido[1,2-a][1,3,5]triazin-6-one (5bk)**

mp 202-203°C (AcOEt+EtOH); Anal. Calcd. for  $\text{C}_{18}\text{H}_{21}\text{N}_5\text{O}$ : C, 66.85; H, 6.55; N, 21.66. Found: C, 66.76; H, 6.71; N, 21.59.  $^1\text{H}$  NMR (300 MHz,  $\text{Me}_2\text{SO}-d_6$ ): 1.86 (8H, br s, pyrrolidino), 2.05 (3H, s, 8-Me), 2.26 (3H, s, 4'-Me), 5.70 (1H, s, H-7), 6.79 (1H, d,  $J = 3.4$  Hz, H-4), 7.08 (2H, d,  $J = 8.3$  Hz, H-3' and H-5'), 7.15 (2H, d,  $J = 8.3$  Hz, H-2' and H-6'), 8.59 (1H, d,  $J = 3.7$  Hz, NH);  $^{13}\text{C}$  NMR (75 MHz,  $\text{Me}_2\text{SO}-d_6$ ): 20.5 (4'-Me), 23.8 (8-Me), 59.6 (C-4), 101.9 (C-7), 125.2 (C-2' and C-6'), 129.1 (C-3' and C-5'), 136.9 (C-1'), 137.7 (C-4'), 153.6 (C-9a), 160.5 (C-6), 165.7 (C-8).

**8-Methyl-2-(4-methylpiperazino)-4-(4-methylphenyl)-3,4-dihydropyrimido[1,2-a][1,3,5]triazin-6-one (5bl)**

mp 208-209°C (AcOEt); Anal. Calcd. for  $\text{C}_{19}\text{H}_{24}\text{N}_6\text{O}$ : C, 64.75; H, 6.86; N, 23.85. Found: C, 64.90; H, 6.92; N, 23.95.  $^1\text{H}$  NMR (300 MHz,  $\text{Me}_2\text{SO}-d_6$ ): 2.07 (3H, s, 8-Me), 2.18 (3H, s, N-Me), 2.26 (3H, s, 4'-Me), 3.46-3.67 (4H, s, piperazino), 5.76 (1H, s, H-7), 6.80 (1H, s, H-4), 7.05 (2H, d,  $J = 8.0$  Hz, H-3' and H-5'), 7.18 (2H, d,  $J = 7.9$  Hz, H-2' and H-6'), 8.85 (1H, br s, NH);  $^{13}\text{C}$  NMR (75 MHz,  $\text{Me}_2\text{SO}-d_6$ ): 20.5 (4'-Me), 23.7 (8-Me), 44.0, 45.4, 54.0, 59.5 (C-4), 102.5 (C-7), 125.0 (C-2' and C-6'), 129.1 (C-3' and C-5'), 136.5 (C-1'), 137.8 (C-4'), 153.5 (C-9a), 154.7 (C-2), 160.4 (C-6), 165.7 (C-8).

**2-(3-Chlorophenylamino)-8-methyl-4-(4-methylphenyl)-3,4-dihydropyrimido[1,2-a][1,3,5]triazin-6-one (5bm)**

Mp 259-260°C Anal. Calcd. for  $\text{C}_{20}\text{H}_{18}\text{N}_5\text{OCl}$ : C, 63.24; H, 4.78; N, 18.44. Found: 63.31; H, 4.86; N 18.55.  $^1\text{H}$  NMR (300 MHz,  $\text{Me}_2\text{SO}-d_6$ ): 2.13 (3H, s, 8-Me), 2.26 (3H, s, 4'-Me), 5.87 (1H, s, H-7), 6.92 (1H, s, H-4), 7.03-7.22 (5H, m, H-3', H-5', H-2', H-6' and H-4''), 7.30-7.42 (2H, m, H-5'' and H-6''), 7.81 (1H, s, H-2''), 8.38 (1H, br s, NH), 9.70 (1H, br s, NH).

**2-(3-Chlorophenylamino)-4-(5-(hydroxymethyl)furan-2-yl)-8-methyl-3,4-dihydropyrimido[1,2-a][1,3,5]triazin-6-one (5bn)**

mp 237-238°C; Anal. Calcd. for  $\text{C}_{18}\text{H}_{16}\text{N}_5\text{O}_3\text{Cl}$ : C, 56.04; H, 4.18; N, 18.15. Found: C, 56.44; H, 4.50; N, 18.01.  $^1\text{H}$  NMR (300 MHz,  $\text{Me}_2\text{SO}-d_6$ ): 2.12 (3H, s, 8-Me), 4.32 (2H, d,  $J = 5.6$  Hz,  $\text{CH}_2$ ), 5.22 (1H, t,  $J = 5.3$  Hz, OH), 5.85 (1H, s, H-7), 6.11-6.28 (2H, m, H-3' and 4'), 6.93 (1H, s, H-4), 7.13 (1H, d,  $J = 7.2$  Hz, H-4''), 7.35 (1H, t,  $J = 8.1$  Hz, H-5''), 7.43 (1H, d,  $J = 7.9$  Hz, H-6''), 7.79 (1H, s, H-2''), 8.53 (1H, s, NH), 9.82 (1H, s, NH);  $^{13}\text{C}$  NMR (75 MHz,  $\text{Me}_2\text{SO}-d_6$ ): 21.0, 23.2, 55.5 ( $\text{CH}_2$ ), 64.8 (C-4), 104.1 ( $\text{CH}_{\text{Ar}}$ ), 107.7 ( $\text{CH}_{\text{Ar}}$ ), 108.1 ( $\text{CH}_{\text{Ar}}$ ), 130.3 ( $\text{CH}_{\text{Ar}}$ ), 133.0, 140.2, 150.3, 152.5 (C-9a), 155.8 (C-2), 159.4 (C-6), 165.7 (C-8).
